# Supplementary material for: Repeats are one of the main characteristics of RNA-binding proteins with prion-like domains
Source: Royal Society of Chemistry journal article supplement (doi:10.1039/c5mb00273g), 2015-05-14
Supplement: c5mb00273g1.pdf [file c5mb00273g1.pdf]

|    | Protein name, Length, Function, Number of protein partners (BioGrid)                         | Amino acid sequence and repeats identified by UniProt and the T-reks program                                                                                                                                                                                                                                                                                                                                                                                                                                                                                                                                                                                                                                                                                                                                                                                                                                                                                                                                                                    | Prion domain, Neurodegenerative disease | Profile of probability to be ordered or disordered by using IsUnstruct program      |
|----|----------------------------------------------------------------------------------------------|-------------------------------------------------------------------------------------------------------------------------------------------------------------------------------------------------------------------------------------------------------------------------------------------------------------------------------------------------------------------------------------------------------------------------------------------------------------------------------------------------------------------------------------------------------------------------------------------------------------------------------------------------------------------------------------------------------------------------------------------------------------------------------------------------------------------------------------------------------------------------------------------------------------------------------------------------------------------------------------------------------------------------------------------------|-----------------------------------------|-------------------------------------------------------------------------------------|
| 1. | <p>RNA-binding protein FUS, 1-526, DNA binding nucleotide binding RNA binding</p> <p>298</p> | <p>&gt;sp P35637 FUS_HUMAN RNA-binding protein FUS OS=Homo sapiens GN=FUS PE=1 SV=1</p> <p>MASNDYTQQATQSYGAYPTQPGQGYSSQSSQPFYQOQSYSGYSQSTDTSGYGQSSYSSYGQSQNTGYGTQSTPQGYGSTGGYGSSQSSQSSYGQSSYPGYGQQPAPSSTSGSYGSSSQSSSYGQPQSGSYSQQFSYGGQQQSYGQQQSYNPPQGYGQQNQYNSSSRGGGGGGGGNYGQDQSSMSSGGGSGGGYGQQDQSGGGGSGGGYGQQDRGGRGRGGSQGGGGGGGYNRSSGGYEPFRGRGGRRGGRGGMGGSDRGGFNKFGGPRDQGSRHDSEQDNSDNNTIFVQGLGENVTIESVADYFKQIGIITNKKTGQPMINLYTDRETGKLGKGEATVSFDDPPSAKAAIDWFDGKEFSGNPIKVSFATRRADFNRRGGNGRGGRRGGPMGRGGYGGGGSGGGRRGGFPSRGGGGQQRAGDWKCPNPTCENMNF'SWRNECNQCKAPKPDGPGGGPGGSHMGGNYGDDRRGGRGGYDRGGYRGRGGDRGGFRGGRGGGDRGGFGPGKMDSRGEHRQDRRERPY</p> <p><u>UniProt</u><br/>Zinc finger 422-453<br/>285-371 RRM<br/>1-165 Q/G/S/Y-rich<br/>166-267 Gly-rich<br/>371-526 RGG</p> <p><u>T-reks</u><br/>Length: 8 residues - nb: 5 from 36 to 76 - Psim:0.74 region Length:41<br/>QSY--SGYS-<br/>QSTDTSGYG-<br/>QSSY-SSYG-<br/>QSQN-TGYGT<br/>QSTP-QGYG-<br/>*****<br/>Length: 8 residues - nb: 2 from 74 to 87 - Psim:0.75 region Length:14<br/>GYGSTG--</p> | <p>N-terminal, 1-237 ALS, FTLD</p>      | 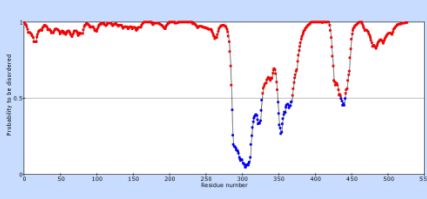 |

```

GYGSSQSS
*****
Length: 8 residues - nb: 3 from 81 to
107 - Psim:0.7 region Length:27
YGSSQSSQSS
YG-QQSSYPG
YG--QQPAPS
*****
Length: 8 residues - nb: 5 from 112
to 147 - Psim:0.7111111111111111 region
Length:36
SYGSSSQSS
SYGQPQSG-
SYSQQP---
SYGGQQQ--
SYGQQQ---
*****
Length: 8 residues - nb: 3 from 132
to 152 - Psim:0.7916666666666666 region
Length:21
QQPSYGG-
QQQSYG--
QQQSYNPP
*****
Length: 10 residues - nb: 9 from 20
to 109 - Psim:0.7142857142857143 region
Length:90
QPGQGYS-QQSS-----
---QPYG--QSSYSG-----
-----Y--SQSTDTSGY----
-----G--QSSYSSY-----
-----G--QSQNTGYG-T--
-----QSTPQGYGSTGG
-----YGSSQSSQSS-----
-----YG-QQSSYPG-----
-----YG-QQPAPSSST-----
*****
Length: 11 residues - nb: 7 from 91
to 166 - Psim:0.7142857142857143 region
Length:76
---YGQ-Q---S-S-Y-PG---
---YGQ-QPAPS-S-T-SG--S
---YGS-S---S-Q-S-SS---
---YGQPQ---S-GS-YS--Q-
QPSYGG-Q----Q-QS--Y---
----GQ-Q---Q-S-YNPPQGY

```

|    |                                                                                                                  |                                                                                                                                                                                                                                                                                                                                                                                                                                                                                                                                                                                                                                                                                                                                                                                                                                                                                                                                                                                                                                                                                                                                                                                                                                                                                                                                                                                                                                               |                                                          |                                                                                     |
|----|------------------------------------------------------------------------------------------------------------------|-----------------------------------------------------------------------------------------------------------------------------------------------------------------------------------------------------------------------------------------------------------------------------------------------------------------------------------------------------------------------------------------------------------------------------------------------------------------------------------------------------------------------------------------------------------------------------------------------------------------------------------------------------------------------------------------------------------------------------------------------------------------------------------------------------------------------------------------------------------------------------------------------------------------------------------------------------------------------------------------------------------------------------------------------------------------------------------------------------------------------------------------------------------------------------------------------------------------------------------------------------------------------------------------------------------------------------------------------------------------------------------------------------------------------------------------------|----------------------------------------------------------|-------------------------------------------------------------------------------------|
|    |                                                                                                                  | <p>----GQ-Q---N-Q-YNSSSG-<br/>       *****</p> <p>Length: 13 residues - nb: 2 from 189 to 216 - Psim:0.8333333333333334 region<br/>       Length:28<br/>       GSGGGYGNQDQSGGG<br/>       GSGG-YGQQDR-GGR</p>                                                                                                                                                                                                                                                                                                                                                                                                                                                                                                                                                                                                                                                                                                                                                                                                                                                                                                                                                                                                                                                                                                                                                                                                                                 |                                                          |                                                                                     |
| 2. | <p>TATA-binding protein-associated factor 2N, 1-592<br/>       DNA binding poly(A) RNA binding<br/>       53</p> | <p>&gt;tr Q86X94 Q86X94_HUMAN TAF15 RNA polymerase II, TATA box binding protein (TBP)-associated factor, 68kDa OS=Homo sapiens GN=TAF15 PE=2 SV=2<br/>       MSDSGSYGQSGGEEQQSYSTYGNPGSQGYGQASQSYSGYG<br/>       QTTDSSYGQNYSGYSSYGQSQSGYSQSYGGYENQKQSSY<br/>       SQQPYNNQGGQQNMESSGSQGGRAPSYDQPDYGGQDSYD<br/>       QQSGYDQHQGSYDEQSNYDQQHDSYSQNNQSYHSQRENY<br/>       SHHTQDDRRRDVSRYGEDNRGYGGSQGGRRGRGGYDKDGR<br/>       GPMTGSSGGDRGGFKNFGGHRDYGPRTDADSESDNSDNN<br/>       TIFVQGLGEGVSTDQVGEFFKQIGI IKTNKKTKGKPMINL<br/>       YTDKDTGKPKGEATVSFDDPPSAKAAIDWFDGKEFHGNI<br/>       IKVSFATRRPEFMRGGGSGGGRRGRGGYRGRGGFQGRGG<br/>       DPKSGDWVCPNPSCGNMNFARRNSCNQCNEPRPEDSRPS<br/>       GGDFRGRGYGGERGYRGRGGRGGDRGGYGGDRSGGGYGG<br/>       DRSSGGGYSGDRSGGGYGGDRSGGGYGGDRGGYGGDRG<br/>       GGYGGDRGGYGGDRGGYGGDRGGYGGDRGGYGGDRGG<br/>       YGGDRGGYGGDRGGYGGDRSRGGYGGDRGGGSGYGGDRS<br/>       GGYGGDRSGGGYGGDRGGYGGDRGGYGGKMGGRNDYRN<br/>       DQRNRPY</p> <p><b>UniProt</b><br/>       407-575 21 X approximate tandem repeats of D-R-[S,G](0,3)-G-G-Y-G-G<br/>       354-385 Zinc finger<br/>       234-320 RRM<br/>       407-575 - 21 repeats<br/>       1-208 Q/G/S/Y-rich<br/>       320-590 - RGG-rich<br/>       576-592 - NLS</p> <p><b>T-reks</b><br/>       Length: 7 residues - nb: 4 from 116 to 141 - Psim:0.75 region Length:26<br/>       YDQQ-SG-<br/>       YDQH-QGS<br/>       YDEQ-SN-<br/>       YDQQHDS-</p> | <p>N-terminal,<br/>       1-152<br/>       ALS, FTLD</p> | 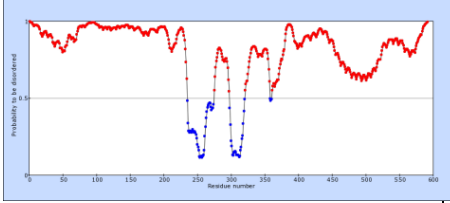 |

\*\*\*\*\*

Length: 7 residues - nb: 4 from 331  
to 356 - Psim:0.71875 region Length:26  
GGGR-RGR  
GG-Y-RGR  
GG-F-QGR  
GG-DPKSG

\*\*\*\*\*

Length: 7 residues - nb: 11 from 454  
to 534 - Psim:0.9090909090909091 region  
Length:81

-GY-GGDRGG  
-GY-GGDRGG  
-GY-GGDRGG  
-GY-GGDRG-  
-GY-GGDRGG  
-GY-GGDRG-  
-GY-GGDRG-  
-GY-GGDRG-  
-GY-GGDRG-  
-GY-GGDRG-  
-GY-GGDRS-  
RGGYGGD---

\*\*\*\*\*

Length: 7 residues - nb: 14 from 466  
to 567 - Psim:0.8333333333333334 region  
Length:102

DRG-G-GYGG--  
DRG-G-GYGG--  
DRG-G--YGG--  
DRG-G-GYGG--  
DRG-G--YGG--  
DRG-G--YGG--  
DRG-G--YGG--  
DRG-G--YGG--  
DRSRRG-GY----  
G-G-DRG-GG--  
S-G----YGGDR  
S-G-G--YGGDR  
S-G-G-GYGG--  
DRG-G-GYG---

\*\*\*\*\*

Length: 7 residues - nb: 14 from 479

```
to 578 - Psim:0.8441558441558441 region
Length:100
--YGGDR-GG-
--YGGDR-GGG
--YGGDR-GG-
--YGGDR-GG-
--YGGDR-GG-
--YGGDR-GG-
--YGGDR-SR-
GGYGGDR----
G--GGS--GY-
G--G-DRSGG-
--YGGDRSGG-
G-YGGDR-GG-
G-YGGDR-G--
G-YGG-K-MG-
*****

Length: 7 residues - nb: 5 from 490
to 525 - Psim:0.975 region Length:36
RGGGYGGD
RGG-YGGD
RGG-YGGD
RGG-YGGD
RGG-YGGD
*****

Length: 7 residues - nb: 4 from 503
to 530 - Psim:0.90625 region Length:28
GDRG-GYG
GDRG-GYG
GDRG-GYG
GDRSRG-G
*****

Length: 7 residues - nb: 3 from 514
to 534 - Psim:0.7777777777777778 region
Length:21
-GY-GGDRG
-GY-GGDRS
RGGYGGD--
*****

Length: 7 residues - nb: 6 from 536
to 578 - Psim:0.7592592592592593 region
Length:43
```

G-GGS--GY  
 G-G-DRSGG  
 -YGGDRSGG  
 GYGGDR-GG  
 GYGGDR-G-  
 GYGG-K-MG  
 \*\*\*\*\*

Length: 7 residues - nb: 3 from 557  
 to 578 - Psim:0.875 region Length:22  
 GYGGDRGG  
 GYGGDRG-  
 GYGGKMG-  
 \*\*\*\*\*

Length: 8 residues - nb: 7 from 7 to  
 63 - Psim:0.7428571428571429 region  
 Length:57  
 YGQ-S-G-GEQ----  
 --Q-SYS-T-----  
 YGN-PGSQG-----  
 YGQASQS---Y--SG  
 YGQ-TTD-S-S----  
 YGQ-NYS-G-YSS--  
 YGQ-SQS-G-Y----  
 \*\*\*\*\*

Length: 8 residues - nb: 4 from 39 to  
 72 - Psim:0.65 region Length:34  
 GQT-TD-SSY  
 GQNYSGYSSY  
 GQSQSGYS--  
 -QSYGGYEN-  
 \*\*\*\*\*

Length: 8 residues - nb: 3 from 338  
 to 357 - Psim:0.6666666666666666 region  
 Length:20  
 GGY-RG-R  
 GGF-QG-R  
 GGDPKSGD  
 \*\*\*\*\*

Length: 8 residues - nb: 20 from 413  
 to 575 - Psim:0.9125 region Length:163  
 GDR--GG--YG-

GDRS-GG-GYG-  
GDRSSGG-GYS-  
GDRS-GG-GYG-  
GDRS-GG-GYG-  
GDR--GG-GYG-  
GDR--GG-GYG-  
GDR--GG-GYG-  
GDR--GG--YG-  
GDR--GG-GYG-  
GDR--GG--YG-  
GDR--GG--YG-  
GDR--GG--YG-  
GDR--GG--YG-  
GDRS-RG-GYG-  
GDRG-GGSGYG-  
GDRS-GG--YG-  
GDRS-GG-GYG-  
GDR--GG-GYG-  
GDR--GG--YGG  
\*\*\*\*\*

Length: 8 residues - nb: 19 from 423  
to 576 - Psim:0.8866396761133604 region  
Length:154

--SGG-GYGGDRS  
--SGG-GYSG--D  
-RSGG-GYGG---  
DRSGG-GYGG---  
DR-GG-GYGG---  
DR-GG-GYGG---  
DR-GG-GYGG---  
DR-GG--YGG---  
DR-GG-GYGG---  
DR-GG--YGG---  
DR-GG--YGG---  
DR-GG--YGG---  
DR-GG--YGG---  
DRSRG-GYGG---  
DRGGGSGYGG---  
DRSGG--YGG---  
DRSGG-GYGG---  
DR-GG-GYGG---  
DR-GG--YGG--K  
\*\*\*\*\*

Length: 8 residues - nb: 17 from 439

to 575 - Psim:0.9321266968325792 region  
Length:137  
GDRSG-GG--YG-  
GDRSG-GG--YG-  
GDR-G-GG--YG-  
GDR-G-GG--YG-  
GDR-G-GG--YG-  
GDR-G-G---YG-  
GDR-G-GG--YG-  
GDR-G-G---YG-  
GDR-G-G---YG-  
GDR-G-G---YG-  
GDR-G-G---YG-  
GDR-SRGG--YG-  
GDR-G-GSGYG-  
GDR-S-GG--YG-  
GDRSG-GG--YG-  
GDR-G-GG--YG-  
GDR-G-G---YGG  
\*\*\*\*\*

Length: 8 residues - nb: 16 from 455  
to 580 - Psim:0.921875 region  
Length:126  
YGGDR-G-GG--  
YGGDR-G-GG--  
YGGDR-G-GG--  
YGGDR-G-G---  
YGGDR-G-GG--  
YGGDR-G-G---  
YGGDR-G-G---  
YGGDR-G-G---  
YGGDR-G-G---  
YGGDR-SRGG--  
YGGDR-G-GSG  
YGGDR-S-GG--  
YGGDRSG-GG--  
YGGDR-G-GG--  
YGGDR-G-G---  
YGGKM-G-GR--  
\*\*\*\*\*

Length: 8 residues - nb: 14 from 467  
to 575 - Psim:0.8428571428571429 region  
Length:109  
--RG-G-GYG-GD--



```
--RG-G-GYG-GD--  
--RG-G--YG-GD--  
--RG-G-GYG-GD--  
--RG-G--YG-GD--  
--RG-G--YG-GD--  
--RG-G--YG-GD--  
--RG-G--YG-GD--  
--RG-G--YG-GDRS  
--RG-G--YG-GD--  
--RG-G-GSGYG---  
GDRS-G-GYG-----  
GDRS-GGG-YG----  
GDRG-G-GYG-----  
--GDRG-GYG-G---  
*****
```

Length: 8 residues - nb: 12 from 481  
to 575 - Psim:0.9166666666666666 region

Length:95

```
GDR-G-G---YG-  
GDR-G-GG--YG-  
GDR-G-G---YG-  
GDR-G-G---YG-  
GDR-G-G---YG-  
GDR-G-G---YG-  
GDR-SRGG--YG-  
GDR-G-GSGYG-  
GDR-S-GG--YG-  
GDRSG-GG--YG-  
GDR-G-GG--YG-  
GDR-G-G---YGG  
*****
```

Length: 8 residues - nb: 11 from 493  
to 579 - Psim:0.9015151515151515 region

Length:87

```
GYGGDR-G-----  
GYGGDR-G-----  
GYGGDR-G-----  
GYGGDR-G-----  
GYGGDR-SRG--  
GYGGDR-G-GGS  
GYGGDR-S-G--  
GYGGDRSG-G--  
GYGGDR-G-G--  
GYGGDR-G-----  
GYGGKM-G-G--
```

```
*****
Length: 8 residues - nb: 9 from 504
to 576 - Psim:0.9074074074074074 region
Length:73
DR--GG--YGG-
DR--GG--YGG-
DR--GG--YGG-
DRSRGG--YGG-
DRG-GGSGYGG-
DRS-GG--YGG-
DRS-GG-GYGG-
DRG-GG--YGG-
DR--GG--YGGK
*****

Length: 8 residues - nb: 8 from 515
to 580 - Psim:0.8375 region Length:66
YGGDR-GG--
YGGDRSRG-G
YGGDRGGGSG
YGGDRSGG--
YGGDRSGG-G
YGGDR-GG-G
YGGDR-GG--
YGG-KMGG-R
*****

Length: 8 residues - nb: 6 from 525
to 576 - Psim:0.8787878787878788 region
Length:52
DRSRG-GYGG-
DRGGGSGYGG-
DRSGG--YGG-
DRSGG-GYGG-
DR-GG-GYGG-
DR-GG--YGGK
*****

Length: 8 residues - nb: 5 from 540
to 579 - Psim:0.8888888888888888 region
Length:40
GYGGDR-SG
GYGGDRSGG
GYGGDR-GG
GYGGDR-G-
```

GYGKMG-GG  
\*\*\*\*\*

Length: 8 residues - nb: 3 from 552  
to 576 - Psim:0.9 region Length:25  
DRSGGGYGG-  
DR-GGGYGG-  
DR-GG-YGGK  
\*\*\*\*\*

Length: 9 residues - nb: 5 from 20 to  
66 - Psim:0.7 region Length:47  
YG--NP-G-SQG  
YGQASQS-YS-G  
YGQ-T-TD-S-S  
YGQ-NYSGYS-S  
YGQ-SQSGYSQS  
\*\*\*\*\*

Length: 9 residues - nb: 4 from 38 to  
75 - Psim:0.65909090909091 region  
Length:38  
YGQT-TD-S-S  
YGQNYSGYS-S  
YGQSQSGYSQS  
YG-GYENQK-Q  
\*\*\*\*\*

Length: 9 residues - nb: 3 from 52 to  
77 - Psim:0.6666666666666666 region  
Length:26  
GYSSYGQSQS  
GYS---QSYG  
GYENQKS-S  
\*\*\*\*\*

Length: 9 residues - nb: 20 from 413  
to 576 - Psim:0.9041666666666667 region  
Length:164  
GDR--G-G--YG  
GDRS-G-G-GYG  
GDRSSG-G-GYS  
GDRS-G-G-GYG  
GDRS-G-G-GYG  
GDR--G-G-GYG  
GDR--G-G-GYG

GDR--G-G-GYG  
 GDR--G-G--YG  
 GDR--G-G-GYG  
 GDR--G-G--YG  
 GDR--G-G--YG  
 GDR--G-G--YG  
 GDR--G-G--YG  
 GDRS-R-G-GYG  
 GDRG-G-GSGYG  
 GDRS-G-G--YG  
 GDRS-G-G-GYG  
 GDR--G-G-GYG  
 GDRG-GYG-GK-  
 \*\*\*\*\*  
  
 Length: 9 residues - nb: 3 from 423  
 to 450 - Psim:0.9333333333333333 region  
 Length:28  
 SGGGYGGDRS  
 SGGGYSGDR-  
 SGGGYGGDR-  
 \*\*\*\*\*  
  
 Length: 9 residues - nb: 17 from 439  
 to 576 - Psim:0.9327731092436975 region  
 Length:138  
 GDRSG-GG--YG--  
 GDRSG-GG--YG--  
 GDR-G-GG--YG--  
 GDR-G-GG--YG--  
 GDR-G-GG--YG--  
 GDR-G-G---YG--  
 GDR-G-GG--YG--  
 GDR-G-G---YG--  
 GDR-G-G---YG--  
 GDR-G-G---YG--  
 GDR-G-G---YG--  
 GDR-SRGG--YG--  
 GDR-G-GGSGYG--  
 GDR-S-GG--YG--  
 GDRSG-GG--YG--  
 GDR-G-GG--YG--  
 GDR-G-G---YGGK  
 \*\*\*\*\*  
  
 Length: 9 residues - nb: 16 from 455



GDR-G-GGSGYG--  
GDR-S-GG--YG--  
GDRSG-GG--YG--  
GDR-G-GG--YG--  
GDR-G-G---YGGK  
\*\*\*\*\*

Length: 9 residues - nb: 11 from 493  
to 580 - Psim:0.8939393939393939 region  
Length:88  
GYGGDR-G----  
GYGGDR-G----  
GYGGDR-G----  
GYGGDR-G----  
GYGGDR-SRG--  
GYGGDR-G-GGS  
GYGGDR-S-G--  
GYGGDRSG-G--  
GYGGDR-G-G--  
GYGGDR-G----  
GYGGKM-G-G-R  
\*\*\*\*\*

Length: 9 residues - nb: 9 from 504  
to 577 - Psim:0.905982905982906 region  
Length:74  
DR--GG--YGG--  
DR--GG--YGG--  
DR--GG--YGG--  
DRSRGG--YGG--  
DRG-GGSGYGG--  
DRS-GG--YGG--  
DRS-GG-GYGG--  
DRG-GG--YGG--  
DR--GG--YGGKM  
\*\*\*\*\*

Length: 9 residues - nb: 8 from 515  
to 581 - Psim:0.825 region Length:67  
YGGDR-GG--  
YGGDRSRG-G  
YGGDRGGGSG  
YGGDRSGG--  
YGGDRSGG-G  
YGGDR-GG-G  
YGGDR-GG--

YGG-KMGGRN  
\*\*\*\*\*

Length: 9 residues - nb: 3 from 528  
to 552 - Psim:0.777777777777778 region  
Length:25  
-RG-G---YGGD  
-RG-GSGYGG-  
DRSG---GYGGD  
\*\*\*\*\*

Length: 9 residues - nb: 5 from 541  
to 581 - Psim:0.86 region Length:41  
YGGDR-SG-G  
YGGDRSGG-G  
YGGDR-GG-G  
YGGDR-GG--  
YGGKM-GGRN  
\*\*\*\*\*

Length: 9 residues - nb: 3 from 557  
to 580 - Psim:0.8518518518518519 region  
Length:24  
GYGGDRGG-  
GYGGDRG--  
GYGKMGGR  
\*\*\*\*\*

Length: 11 residues - nb: 3 from 44  
to 75 - Psim:0.6944444444444444 region  
Length:32  
SSYGQNYSGY--  
SSYGQSQSGY-S  
QSYG-GYENQKQ  
\*\*\*\*\*

Length: 11 residues - nb: 5 from 417  
to 464 - Psim:0.9166666666666666 region  
Length:48  
GYGGDRS-GG--  
GYGGDRSSGG--  
GYSGDRS-GG--  
GYGGDRS-GG--  
GYGGDRG-GGYG  
\*\*\*\*\*

|    |                                                                                                      |                                                                                                                                                                                                                                                                                                                                                                                                                                                                                                                                                                                                                                                                                                                                                                                                                  |                                                        |                                                                                       |
|----|------------------------------------------------------------------------------------------------------|------------------------------------------------------------------------------------------------------------------------------------------------------------------------------------------------------------------------------------------------------------------------------------------------------------------------------------------------------------------------------------------------------------------------------------------------------------------------------------------------------------------------------------------------------------------------------------------------------------------------------------------------------------------------------------------------------------------------------------------------------------------------------------------------------------------|--------------------------------------------------------|---------------------------------------------------------------------------------------|
|    |                                                                                                      | <p>Length: 11 residues - nb: 3 from 431 to 460 - Psim:0.8888888888888888 region<br/> Length:30<br/> RSSGGGYSGD--<br/> RS-GGGYGGD--<br/> RS-GGGYGGDRG<br/> *****</p> <p>Length: 11 residues - nb: 5 from 519 to 567 - Psim:0.8153846153846154 region<br/> Length:49<br/> RGGYGGDRS----<br/> RGGYGGDRGGG--<br/> -SGYGGDRSG---<br/> -G-YGGDRSGG--<br/> -G-YGGDRGGGYG<br/> *****</p> <p>Length: 13 residues - nb: 4 from 27 to 74 - Psim:0.6666666666666666 region<br/> Length:48<br/> GY-GQ--A-SQ--S-YS-<br/> GYGQTTDSSYGQ-N--YS<br/> GY-S---SYGQ--S-QS-<br/> GY-SQ--SYGG-YENQK-<br/> *****</p> <p>Length: 13 residues - nb: 3 from 46 to 79 - Psim:0.6888888888888889 region<br/> Length:34<br/> YG--QNYSG--YS-S<br/> YG--QSQSG--YSQS<br/> YGGYENQKQSS-YS-<br/> *****</p>                                          |                                                        |                                                                                       |
| 3. | <p>RNA-binding protein EWS, 1-656 identical protein binding poly(A) RNA binding zinc ion binding</p> | <p>&gt;sp Q01844 EWS_HUMAN RNA-binding protein EWS OS=Homo sapiens GN=EWSR1 PE=1 SV=1<br/> MASTDYS<b>TY</b>SQAA<b>QQ</b>GYSAYTA<b>QPTQ</b>G<b>YAQTTQ</b>AYG<b>QQ</b><br/> <b>SYGTYG</b>QPTDV<b>SYTQAQTTATYG</b>QTAYAT<b>SYGQPPTGYT</b><br/> <b>TPTAPQAYSQ</b>PVQ<b>GGYGTGAYD</b>TTTATVTT<b>TQAS</b>YAAQ<b>SA</b><br/> <b>YGTQPAYPAYGQ</b>QPAATAPTR<b>PDGNKPTETSQ</b>PQS<b>STG</b><br/> <b>GYNQPSLGYG</b>QSN<b>YSYPQV</b>PGSY<b>PMQPV</b>TAP<b>PSYP</b>PT<b>SY</b><br/> <b>SSTQPTSYDQ</b>S<b>YSQQNTYG</b>Q<b>PSY</b>G<b>QQSSY</b>G<b>QQSSY</b>G<b>Q</b><br/> <b>QPPTSYPP</b>Q<b>TGSYSQ</b>AP<b>SQYSQ</b>QSS<b>SYGQ</b>SS<b>FRQ</b>D<b>HPS</b><br/> <b>SMGVY</b>G<b>QESGGH</b>SG<b>PGENR</b>SMS<b>GP</b>DNRGRGR<b>GGFDR</b>GGM<br/> SRGGRGGGRGGMG<b>S</b>AGERGG<b>FNK</b>PGG<b>PMDE</b>GP<b>DL</b>DLG<b>PP</b></p> | <p>N-terminal, 1-280 ALS, FTLD, Ewing sarcoma (ES)</p> | 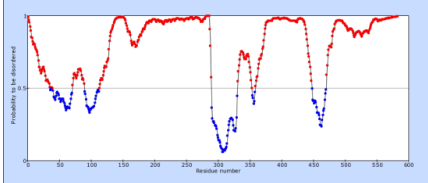 |



|                   |                                                                                                                                                                                                                                                                                                                                                                                                                                                                                                                                                                                                                                                                                                                                                                                                                                                                                                                                                              |                            |  |
|-------------------|--------------------------------------------------------------------------------------------------------------------------------------------------------------------------------------------------------------------------------------------------------------------------------------------------------------------------------------------------------------------------------------------------------------------------------------------------------------------------------------------------------------------------------------------------------------------------------------------------------------------------------------------------------------------------------------------------------------------------------------------------------------------------------------------------------------------------------------------------------------------------------------------------------------------------------------------------------------|----------------------------|--|
| <p><b>210</b></p> | <p>VDPDESDNSAIYVQGLNDSVTLDDLADFFKQCGVVKMN<br/> KRTGQPMIHIYLDKETGKPKGDATVSYEDPPTAKAAVEW<br/> FDGKDFQGSKLKVS LARKKPPMNSMRGGLPPREGRGMPP<br/> PLRGGPGGPGGPGGPMGRMGGRGGDRGGFPPRGPRGSRG<br/> NPSGGNVQHRAGDWQCPNPGCGNQNFARTECNQCKAP<br/> KPEGFLPPPPFPFPPGGDRGRGGPGMRGGRGGLMDRGGPG<br/> GMFRGGRGGDRGGFRGGRGMDRGGFGGGRRGGPGGPPGP<br/> LMEQMGGRRGGRGGPGKMDKGEHRQERRDRPY<br/> UniProt<br/> 8-285; 31 approximate tandem repeats – UniProt<br/> 518-549 Zinc finger<br/> 1-285 Q/P/T/-rich<br/> 361-447 RRM<br/> 639-656 NLS<br/> 300-340 RGG-rich<br/> 454-513 RGG<br/> 559-640 RGG</p> <p><u>T-reks</u><br/> Length: 7 residues - nb: 6 from 207<br/> to 245 - Psim:0.7291666666666666 region<br/> Length:39<br/> SYSQQNT-<br/> -YGQPSS-<br/> -YGQQSS-<br/> -YGQQSS-<br/> -YGQQPPT<br/> SYPPQTG-<br/> *****<br/> Length: 7 residues - nb: 3 from 247<br/> to 267 - Psim:0.7619047619047619 region<br/> Length:21<br/> YSQAPSQ<br/> YSQQSSS<br/> YGQQSSF<br/> *****</p> |                            |  |
| <p>4.</p>         | <p>Heterogeneous nuclear ribonucleoprotein D-like, 1-420<br/> DNA binding nucleotide binding</p> <p>&gt;sp O14979 HNRDL_HUMAN Heterogeneous nuclear ribonucleoprotein D-like<br/> OS=Homo sapiens GN=HNRNPDL PE=1 SV=3<br/> MEVPPRLSHVPPPLFSPAPATLASRSLSHWRPRPPRQLA<br/> PLLPSLAPSSARQGARRAQRHVTAQQPSRLAGGAAIKGG<br/> RRRRPDLFRRHFKSSSIQRSAAAAA TRTARQHPPADSS<br/> VTMEDMNEYSNIEEFAEGSKINASKNQDDGKMFIGGLS<br/> WDTSKKDLTEYLSRFGVVDCTIKTDPVTGRSRGFGFVL<br/> FKDAASVDKVLLELKEHKLDGKLLIDPKRAKALKGKEPPKK</p>                                                                                                                                                                                                                                                                                                                                                                                                                                                     | <p>C-terminal, 316-420</p> |  |

|                                                                       |                                                                                                                                                                                                                                                                                                                                                                                                                                                                                                                                                                                                                                                                                                                                                                                                                                                                                                                                                                                                                             |  |  |
|-----------------------------------------------------------------------|-----------------------------------------------------------------------------------------------------------------------------------------------------------------------------------------------------------------------------------------------------------------------------------------------------------------------------------------------------------------------------------------------------------------------------------------------------------------------------------------------------------------------------------------------------------------------------------------------------------------------------------------------------------------------------------------------------------------------------------------------------------------------------------------------------------------------------------------------------------------------------------------------------------------------------------------------------------------------------------------------------------------------------|--|--|
| <p>poly(A) RNA binding<br/>single-stranded<br/>DNA binding<br/>94</p> | <p>VFVGGLS PDTSEEQIKEYFGAFGEIENIELPMDTKTNER<br/>RGFCFITYTDEEPVKKLLESRYHQIGSGKCEIKVAQPKE<br/>VYR QQQQQK GGRGAAA GGRGGTRGRGRG QGQNWQGFN<br/>NYYDQGYGNYSAYGGDQNYSGYGGYDYGNYGNYGYG<br/>QGYADYSGQQSTYKASRGGGNHQNNYQPY<br/><u>UniProt</u><br/><b>Contains 2 RRM (RNA recognition motif) domains</b><br/>148-230 RRM1<br/>233-312 RRM2<br/>79-82 Poly-Arg<br/>316-321 Poly-Gln<br/>323-411 Gly-rich<br/>353-396 Tyr-rich</p> <p><b><u>T-reks</u></b><br/>&gt;sp O14979 HNRDL_HUMAN Heterogeneous<br/>nuclear ribonucleoprotein D-like<br/>OS=Homo sapiens GN=HNRNPDL PE=1 SV=3<br/>Length: 4 residues - nb: 6 from 373<br/>to 395 - Psim:0.7 region Length:23<br/>GYG--<br/>GYDYT<br/>GYNY-<br/>G-NY-<br/>GYGQ-<br/>GYAD-<br/>*****</p> <p>Length: 6 residues - nb: 4 from 323<br/>to 347 - Psim:0.65625 region Length:25<br/>GGRG-AAA<br/>GGRG-GT-<br/>RGRGRG--<br/>QGQN-WN-<br/>*****</p> <p>Length: 7 residues - nb: 2 from 323<br/>to 336 - Psim:0.7857142857142857 region<br/>Length:14<br/>GGRGAAA<br/>GGRGGTR<br/>*****</p> |  |  |
|-----------------------------------------------------------------------|-----------------------------------------------------------------------------------------------------------------------------------------------------------------------------------------------------------------------------------------------------------------------------------------------------------------------------------------------------------------------------------------------------------------------------------------------------------------------------------------------------------------------------------------------------------------------------------------------------------------------------------------------------------------------------------------------------------------------------------------------------------------------------------------------------------------------------------------------------------------------------------------------------------------------------------------------------------------------------------------------------------------------------|--|--|

|                                                                                                |                                                                                                                                                                                                                                                                                                                                                                                                                                                                                                                                                                                                                                                                                                                                                                                                                                                                                                  |                            |                                                                                       |
|------------------------------------------------------------------------------------------------|--------------------------------------------------------------------------------------------------------------------------------------------------------------------------------------------------------------------------------------------------------------------------------------------------------------------------------------------------------------------------------------------------------------------------------------------------------------------------------------------------------------------------------------------------------------------------------------------------------------------------------------------------------------------------------------------------------------------------------------------------------------------------------------------------------------------------------------------------------------------------------------------------|----------------------------|---------------------------------------------------------------------------------------|
| <p>5. Heterogeneous nuclear ribonucleoprotein D0, 1-355 nucleotide binding RNA binding 169</p> | <p>&gt;sp Q14103 HNRPD_HUMAN Heterogeneous nuclear ribonucleoprotein D0 OS=Homo sapiens GN=HNRNPD PE=1 SV=1<br/> MSEEQFGGDG AAAAA TAAVGG SAGEQEGAMVAATQGAAA<br/> AAGSGAGTGGGTASGGTEGGSAESEGA KIDASKNEEDEG<br/> HSNSSPRHSEAATAQREEWKMF IGGLSWDTTKKDLKDYF<br/> SKFGEVVDCTLKLDPITGRSRGFGFVLFKESESVDKVM D<br/> QKEHKLNGKVIDPKRAKAMKTKEPVKKIFVGG LSPDTPE<br/> EKIREYFGGFGEVESIELPMDNKTNRRGFCFITFKEEE<br/> PVKKIMEKKYHNVGLSKCEIKVAMSKEQY QQQQWGSRG<br/> GFAGRARGRGGGPSQNWNOGYSNYWNOGYGNYGNSQGY<br/> GGYGGYDYTGYNYYGYGDY SNQQSGY GKVSRRGGHQ NS<br/> YKPY<br/> UniProt<br/> Contains 2 RRM (RNA recognition motif) domains<br/> 97-179 RRM1<br/> 182-261 RRM2<br/> 11-45 Ala-rich<br/> 270-347 Gly rich<br/> 294-332 Tyr-rich<br/><br/> <u>T-reks</u><br/> Length: 10 residues - nb: 3 from 290 to 317 - Psim:0.7666666666666667 region<br/> Length:28<br/> WNQYSNY--<br/> WNQYGN YGY<br/> NSQYGGYGG</p> | <p>C-terminal, 262-355</p> |    |
| <p>6. HNRNPA2B1 protein, nucleic acid binding 153</p>                                          | <p>&gt;sp P22626 ROA2_HUMAN Heterogeneous nuclear ribonucleoproteins A2/B1 OS=Homo sapiens GN=HNRNPA2B1 PE=1 SV=2,<br/> <b>C-terminal, 235-327, IBMPFD</b><br/> MEKTLETVPLERKKREKEQFRKLF IGGLSFETTEESLRNYEQWG<br/> KLTDCVVMRDPASKRSRGFGFVTFSSMAEVDAAAMAARPHSID<br/> GRVVEPKRAVAREESGKPGAHVTVKKLFVGGIKEDTEEHLRDY<br/> FEYEGKIDTIEITDRQSGKKRGFGFVTFDDHDPVDKIVLQKYHTI<br/> NGHNAEVRKALSRQEMQEVQSSRSRGGNFGFGDS RGGGGN<br/> FGPGGSNFRGGSDGYGSGRFGDGYNGYGGPGGGNFGGS<br/> PGYGGGRGGYGGGGPGYGNQGGGYGGYDNYGGNYGSG<br/> NYNDFGNYNQQPSNYGPMKSGNF GGSRNMGGPYGGNYGP<br/> GGSGGSGGYGGRSRY</p>                                                                                                                                                                                                                                                                                                                  | <p>C-terminal, IBMPFD</p>  |  |

|                                                                                                                                          |                                                                                                                                                                                                                                                                                                                                                                                                                                                                                                                                                                                                                                                                                                                                                                                                                                                                                                                                                                                                                                                                                                                                                                                                                                                             |                                         |                                                                                     |
|------------------------------------------------------------------------------------------------------------------------------------------|-------------------------------------------------------------------------------------------------------------------------------------------------------------------------------------------------------------------------------------------------------------------------------------------------------------------------------------------------------------------------------------------------------------------------------------------------------------------------------------------------------------------------------------------------------------------------------------------------------------------------------------------------------------------------------------------------------------------------------------------------------------------------------------------------------------------------------------------------------------------------------------------------------------------------------------------------------------------------------------------------------------------------------------------------------------------------------------------------------------------------------------------------------------------------------------------------------------------------------------------------------------|-----------------------------------------|-------------------------------------------------------------------------------------|
| <p>7. Heterogeneous nuclear ribonucleoprotein A1, 1-372 nucleotide binding RNA binding single-stranded RNA binding</p> <p><b>308</b></p> | <pre>&gt;sp P09651 ROA1_HUMAN Heterogeneous nuclear ribonucleoprotein A1 OS=Homo sapiens GN=HNRNPA1 PE=1 SV=5 MSKSESPKEPEQLRKLFIGGLSFETTDESLRSHFEQWGT LTDCVVMRDPNPKRSRGGFVVTYATVEEVDAAMNARPHK VDGRVVEPKRAVSREDSQRPGAHLTVKKIFVGGIKEDTE EHHLRDYFEQYGKIEVIEIMTDRGSGKKRGFVTFDDH DSVDKIVIQKYHTVNGHNCEVRKALSKQEMASASSSQRG RSGSGNFGGGRGGGFGGNDNFGRGGNFSGRGGFGGSRGG GGYGGSGDGYNGFGNDGGYGGGGPYSGGSRGYGSGGQG YGNQGSYGGSSTYDSYNNGGGGGFGGSGSNFGGGGSY NDFGNYNQSSNFGPMKGGNFGGRSSGPYGGGGQYFAKP RNQGGYGGSSSSSYGSRRF</pre> <p>UniProt</p> <p>Contains 2 RRM (RNA recognition motif) domains</p> <p>14-97 RRM1</p> <p>105-184 RRM2</p> <p>218-240 RNA-binding RGG-box</p> <p>4-94 Globular A domain</p> <p>95-185 Globular B domain</p> <p>195-372 Gly-rich</p> <p><u>T-reks</u></p> <p>Length: 6 residues - nb: 3 from 217 to 235 - Psim:0.7619047619047619 region</p> <p>Length:19</p> <p>GRGGNFS</p> <p>GRGG-FG</p> <p>GSRG-GG</p> <p>*****</p> <p>Length: 6 residues - nb: 5 from 252 to 285 - Psim:0.7142857142857143 region</p> <p>Length:34</p> <p>GYGGGGP</p> <p>GYSGGSR</p> <p>GYGSGGQ</p> <p>GYGNQGS</p> <p>YGGS-</p> <p>*****</p> <p>Length: 6 residues - nb: 3 from 267 to 286 - Psim:0.7142857142857143 region</p> <p>Length:20</p> <p>YSGGGQG</p> <p>YGNQGS</p> | <p>C-terminal, 186-372 IBMPFD3, ALS</p> | 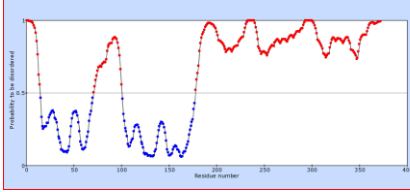 |
|------------------------------------------------------------------------------------------------------------------------------------------|-------------------------------------------------------------------------------------------------------------------------------------------------------------------------------------------------------------------------------------------------------------------------------------------------------------------------------------------------------------------------------------------------------------------------------------------------------------------------------------------------------------------------------------------------------------------------------------------------------------------------------------------------------------------------------------------------------------------------------------------------------------------------------------------------------------------------------------------------------------------------------------------------------------------------------------------------------------------------------------------------------------------------------------------------------------------------------------------------------------------------------------------------------------------------------------------------------------------------------------------------------------|-----------------------------------------|-------------------------------------------------------------------------------------|

|                                                                                     |  |                                                                                                                                                                                                                                                                                                                                                                                                                                                                                                                                                                                                                                                                                                                                                                                                                                                                                                                                                                                                                                                                                                                                                                                                                                                                                             |                                |                                                                                     |
|-------------------------------------------------------------------------------------|--|---------------------------------------------------------------------------------------------------------------------------------------------------------------------------------------------------------------------------------------------------------------------------------------------------------------------------------------------------------------------------------------------------------------------------------------------------------------------------------------------------------------------------------------------------------------------------------------------------------------------------------------------------------------------------------------------------------------------------------------------------------------------------------------------------------------------------------------------------------------------------------------------------------------------------------------------------------------------------------------------------------------------------------------------------------------------------------------------------------------------------------------------------------------------------------------------------------------------------------------------------------------------------------------------|--------------------------------|-------------------------------------------------------------------------------------|
|                                                                                     |  | <p>YGGSGS-<br/> *****<br/> Length: 7 residues - nb: 2 from 216 to 229 - Psim:0.7857142857142857 region<br/> Length:14<br/> FGRGGNF<br/> SGRGGFG<br/> *****</p>                                                                                                                                                                                                                                                                                                                                                                                                                                                                                                                                                                                                                                                                                                                                                                                                                                                                                                                                                                                                                                                                                                                              |                                |                                                                                     |
| <p>8. Heterogeneous nuclear ribonucleoprotein A/B, nucleic acid binding<br/> 60</p> |  | <p>&gt;tr D6RD18 D6RD18_HUMAN Heterogeneous nuclear ribonucleoprotein A/B OS=Homo sapiens GN=HNRNPAB PE=2 SV=1<br/> MSEAGEEQPMETTGATENGHEAVPEGESPA<b>GAGT</b><b>GAAAAG</b><br/> <b>AGGATA</b>APPSGNQNGAEGDQINASKNEEDAGKMFVGGLS<br/> WDTSKKDLKDY<b>F</b><b>T</b><b>K</b><b>F</b>GEVVDCTIKMDPNTGRSRG<b>F</b>GFIL<br/> <b>F</b>KDAASVEKVL<b>D</b>QKEHRLDGRVIDPKKAMAMKKDPVKKI<br/> <b>F</b>VGGLNPEATEEKIRE<b>Y</b><b>F</b>GE<b>F</b>GEIEAIELPMDPKLNKRR<br/> <b>G</b><b>F</b><b>V</b><b>F</b><b>I</b><b>T</b><b>F</b>KEEEPVKKVLEK<b>F</b>H<b>T</b>VSGSKCEIKVAQPKEV<br/> <b>Y</b><b>Q</b><b>Q</b><b>Q</b><b>Y</b>GSGG<b>R</b><b>G</b><b>N</b><b>R</b><b>N</b><b>R</b><b>G</b><b>N</b><b>R</b><b>G</b><b>S</b><b>G</b><b>G</b><b>G</b><b>G</b><b>G</b><b>Q</b>GSTNY<b>G</b>KSQRR<br/> GGHQNNY<b>K</b><b>P</b><b>Y</b><br/> T-teks<br/> Length: 4 residues - nb: 4 from 31 to 45 - Psim:0.75 region Length:15<br/> <b>GAGT</b><br/> <b>GAAA</b><br/> <b>GAG-</b><br/> <b>GATA</b><br/> *****<br/> Length: 4 residues - nb: 4 from 245 to 260 - Psim:0.7 region Length:16<br/> <b>RGNRN</b><br/> <b>RGN--</b><br/> <b>RGS-G</b><br/> <b>GGG-G</b><br/> *****<br/> Length: 5 residues - nb: 3 from 143 to 158 - Psim:0.6666666666666666 region<br/> Length:16<br/> KKAMAM<br/> KKD-PV<br/> KKI-FV</p> | <p>C-terminal<br/> 235-327</p> | 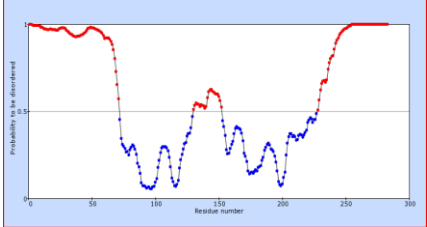 |

|                                                                                               |                                                                                                                                                                                                                                                                                                                                                                                                                                                                                                                                                                                                                                                                                                                                                                                                                                                                                                                                                                                                                                                                                                                                                                                            |                                            |  |
|-----------------------------------------------------------------------------------------------|--------------------------------------------------------------------------------------------------------------------------------------------------------------------------------------------------------------------------------------------------------------------------------------------------------------------------------------------------------------------------------------------------------------------------------------------------------------------------------------------------------------------------------------------------------------------------------------------------------------------------------------------------------------------------------------------------------------------------------------------------------------------------------------------------------------------------------------------------------------------------------------------------------------------------------------------------------------------------------------------------------------------------------------------------------------------------------------------------------------------------------------------------------------------------------------------|--------------------------------------------|--|
| <p>9. Heterogeneous nuclear ribonucleoprotein A3, nucleotide binding RNA binding 1-378 80</p> | <p>&gt;sp P51991 ROA3_HUMAN Heterogeneous nuclear ribonucleoprotein A3 OS=Homo sapiens GN=HNRNPA3 PE=1 SV=2<br/> MEVKPPPGRPQPDSEGGGRRRRRRGEEGHDPKEPEQLRKLFI<br/> GGLSFETDDSLREHFKEKWGLTLDCCVVMRDPQTKRSRGGF<br/> GFVTYSCVEEVDAAMCARPHKVDGRVVEPKRAVSREDSV<br/> KPGAHLTVKKIFVGGIKEDTTEENLRDYFEKYGKIETIE<br/> VMEDRQSGKKRGFAFVTFDDHDTVDKIVVQKYHTINGHN<br/> CEVKKALSKEQEMQSAGSQRGRGGGSGNFMGRGGNFGGGG<br/> GNFGRGGNFGGRGGYGGGGGSRGSYGGGDGGYNGFGGD<br/> GGNYGGGPGYSSRGGYGGGGPGYGNQGGYGGGGYDGY<br/> NEGGNFGGGNYGGGGYNDFGNYSGQQQSNYGPMMKGSF<br/> GGRSSGSPYGGGYGSGGGSGGYGSRRF</p> <p>Contains 2 RRM (RNA recognition motif) domains<br/> 35-118 RRM1<br/> 126-205 RRM2<br/> 211-378 Gly-rich</p> <p><u>T-reks</u><br/> Length: 6 residues - nb: 8 from 221 to 272 - Psim:0.6607142857142857 region<br/> Length:52<br/> GNFMGRG<br/> GNFGGGG<br/> GNFGRG-<br/> GNFGGR-<br/> GGYGGG<br/> GGRGSY<br/> GG-GDGG<br/> YN-GFGG<br/> *****<br/> Length: 6 residues - nb: 4 from 288 to 313 - Psim:0.8125 region Length:26<br/> GYGG-GGP<br/> GYGNQGG-<br/> GYGG-GG-<br/> GYDG-YN-<br/> *****<br/> Length: 6 residues - nb: 4 from 316 to 338 - Psim:0.7083333333333334 region<br/> Length:23<br/> GNFGG-</p> | <p>C-terminal 207-378 C9orf72 ALS/FTLD</p> |  |
|-----------------------------------------------------------------------------------------------|--------------------------------------------------------------------------------------------------------------------------------------------------------------------------------------------------------------------------------------------------------------------------------------------------------------------------------------------------------------------------------------------------------------------------------------------------------------------------------------------------------------------------------------------------------------------------------------------------------------------------------------------------------------------------------------------------------------------------------------------------------------------------------------------------------------------------------------------------------------------------------------------------------------------------------------------------------------------------------------------------------------------------------------------------------------------------------------------------------------------------------------------------------------------------------------------|--------------------------------------------|--|

GNYGGG  
 GNYNDF  
 GNYSGQ  
 \*\*\*\*\*

Length: 7 residues - nb: 7 from 221  
 to 267 - Psim:0.7142857142857143 region  
 Length:47  
 GNFMRGRG-  
 GNFGGGG-  
 GNFRGR--  
 GNFGGRG-  
 G-YGGGG-  
 GGSRGSY-  
 GG-GDGGY  
 \*\*\*\*\*

Length: 7 residues - nb: 5 from 233  
 to 267 - Psim:0.7 region Length:35  
 GGGNFG-R  
 GG-NFGGR  
 GG-YGGGG  
 GG-SRGSY  
 GG-GDGGY  
 \*\*\*\*\*

Length: 7 residues - nb: 10 from 288  
 to 355 - Psim:0.7583333333333333 region  
 Length:68  
 G-YG-G-G--GP  
 G-YG-NQG--G-  
 G-YG-G-G--G-  
 G-YD-GYN--E-  
 G-GNFG-G--G-  
 N-YG-G-G--G-  
 N-YN-D-F--G-  
 N-YS-G-QQOS-  
 N-YG-PMK--G-  
 GSFG-G-R--S-  
 \*\*\*\*\*

Length: 7 residues - nb: 3 from 321  
 to 339 - Psim:0.7142857142857143 region  
 Length:19  
 GNYGGG-  
 GNYNDF-

GNYSGQQ  
 \*\*\*\*\*  
  
 Length: 8 residues - nb: 5 from 211  
 to 248 - Psim:0.76 region Length:38  
 G--SQRGRGG  
 GSGNFMGR--  
 G-GNFGG-GG  
 G--NFG-RG-  
 G--NFGGRGG  
 \*\*\*\*\*  
  
 Length: 8 residues - nb: 3 from 228  
 to 248 - Psim:0.875 region Length:21  
 GNFGG-GG  
 GNFG-RG-  
 GNFGGRGG  
 \*\*\*\*\*  
  
 Length: 8 residues - nb: 4 from 288  
 to 315 - Psim:0.75 region Length:28  
 GYGG-GGP  
 GYGNQGG-  
 GYGG-GG-  
 GYDGYNEG  
 \*\*\*\*\*  
  
 Length: 8 residues - nb: 3 from 349  
 to 372 - Psim:0.6666666666666666 region  
 Length:24  
 GSFGRSS  
 GSPYGGGY  
 GSGGSGG  
 \*\*\*\*\*  
  
 Length: 9 residues - nb: 3 from 211  
 to 236 - Psim:0.696969696969697 region  
 Length:26  
 GS-QR-GRGG-  
 GSGNFMGRG--  
 GN-FG-GGGGN  
 \*\*\*\*\*  
  
 Length: 9 residues - nb: 2 from 228  
 to 243 - Psim:0.8333333333333334 region  
 Length:16



|    |                                                                                                                                                                                                                                          |                                                                                                                                                                                                                                                                                                                                                                                                                                                                                                                                                                                                                                                                                                                                                                                                                                                                                                                                                                                                                                                                                                                                                                                                 |                                      |                                                                                     |
|----|------------------------------------------------------------------------------------------------------------------------------------------------------------------------------------------------------------------------------------------|-------------------------------------------------------------------------------------------------------------------------------------------------------------------------------------------------------------------------------------------------------------------------------------------------------------------------------------------------------------------------------------------------------------------------------------------------------------------------------------------------------------------------------------------------------------------------------------------------------------------------------------------------------------------------------------------------------------------------------------------------------------------------------------------------------------------------------------------------------------------------------------------------------------------------------------------------------------------------------------------------------------------------------------------------------------------------------------------------------------------------------------------------------------------------------------------------|--------------------------------------|-------------------------------------------------------------------------------------|
|    |                                                                                                                                                                                                                                          | <p>GNFG-GGG-<br/>GNFGRGGNF<br/>*****</p> <p>Length: 9 residues - nb: 3 from 288 to 310 - Psim:0.8 region Length:23<br/>GYGG-GG--P<br/>GYGNQGG---<br/>GYGG-GGGYD<br/>*****</p> <p>Length: 9 residues - nb: 3 from 349 to 373 - Psim:0.7037037037037037 region Length:25<br/>GSFGGRSS-<br/>GSPYG-GGY<br/>GSGGSGGY<br/>*****</p>                                                                                                                                                                                                                                                                                                                                                                                                                                                                                                                                                                                                                                                                                                                                                                                                                                                                   |                                      |                                                                                     |
| 10 | <p>TAR DNA-binding protein 43, 1-414 double-stranded DNA binding mRNA 3'-UTR binding poly(A) RNA binding sequence-specific DNA binding transcription factor activity RNA polymerase II distal enhancer sequence-specific DNA binding</p> | <p>&gt;sp Q13148 TADBP_HUMAN TAR DNA-binding protein 43 OS=Homo sapiens GN=TARDBP PE=1 SV=1<br/>MSEYIRVTEDEENDEPIEIPSEDDGTVLLSTVTAQFPGAC<br/>GLRYRNPVSQCMRGVRLVEGILHAPDAGWGNLVYVVNYP<br/>KDNKRKMDETDASSAVKVKRAVQKTSDLIVLGLPWKTTE<br/>QDLKEYFSTFGEVLMVQVKDLKTGHSKGFGFVRFTEYE<br/>TQVKVMSQRHMDGRWCCKLPNSKQSQDEPLRSRKVFV<br/>GRCTEDMTEDELREFFSQYGDVMDVFIKPPFAFAFVTF<br/>ADDQIAQSLCGEDLIKGISVHISNAEPKHNSNRQLERS<br/>GRFGGNPGGF<sup>FGNQGG</sup>FGNSRGGGAGLGN<sup>NN</sup>QGSNMGGGMN<br/>FGA<sup>F</sup>SINPAM<sup>M</sup>AAA<sup>Q</sup>AA<sup>L</sup>QSSW<sup>MM</sup>GMLAS<sup>QQ</sup>NQSGPSG<br/>NN<sup>Q</sup>N<sup>Q</sup>GN<sup>M</sup>Q<sup>R</sup>EP<sup>N</sup>Q<sup>A</sup>F<sup>G</sup>SG<sup>N</sup>NS<sup>YS</sup>GS<sup>NS</sup>GAA<sup>I</sup>GW<sup>GS</sup>ASN<br/><sup>AG</sup>SG<sup>SG</sup>F<sup>NG</sup>GFG<sup>SS</sup>MDSK<sup>SS</sup>GWGM<br/>UniProt<br/>Contains 2 RRM (RNA recognition motif) domains.<br/>104-200 RRM1<br/>191-262 RRM2<br/>274-413 Gly-rich<br/><br/><u>T-reks</u><br/>Length: 8 residues - nb: 3 from 276 to 296 - Psim:0.8148148148148148 region Length:21<br/><sup>FGGN</sup>-<sup>PGG</sup>-<br/><sup>FG</sup>-<sup>N</sup>-<sup>QGG</sup>-</p> | <p>C-terminal, 277-414 ALS, FTLD</p> | 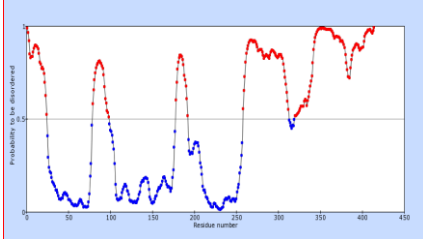 |

|    |                                                                                                           |                                                                                                                                                                                                                                                                                                                                                                                                                                                                                                                                                                                                                                                                                                                                                                                                                                                                                                                                                                                                                                                                                                                                                                                                                                                                                                                                                                                                                                                                                                                                                                                                                                                           |                                               |                                                                                       |
|----|-----------------------------------------------------------------------------------------------------------|-----------------------------------------------------------------------------------------------------------------------------------------------------------------------------------------------------------------------------------------------------------------------------------------------------------------------------------------------------------------------------------------------------------------------------------------------------------------------------------------------------------------------------------------------------------------------------------------------------------------------------------------------------------------------------------------------------------------------------------------------------------------------------------------------------------------------------------------------------------------------------------------------------------------------------------------------------------------------------------------------------------------------------------------------------------------------------------------------------------------------------------------------------------------------------------------------------------------------------------------------------------------------------------------------------------------------------------------------------------------------------------------------------------------------------------------------------------------------------------------------------------------------------------------------------------------------------------------------------------------------------------------------------------|-----------------------------------------------|---------------------------------------------------------------------------------------|
|    | transcription factor activity involved in positive regulation of transcription <b>286</b>                 | <p><b>FG-NSRGGG</b><br/>*****</p> <p>Length: 8 residues - nb: 4 from 368 to 399 - Psim:0.65 region Length:32</p> <p><b>GSGNNSY-S-</b><br/><b>GSNSGAAIGW</b><br/><b>GSAS--N-A-</b><br/><b>GSGSGFN-G-</b></p>                                                                                                                                                                                                                                                                                                                                                                                                                                                                                                                                                                                                                                                                                                                                                                                                                                                                                                                                                                                                                                                                                                                                                                                                                                                                                                                                                                                                                                               |                                               |                                                                                       |
| 11 | cytotoxic granule-associated RNA binding protein, 1-386 AU-rich element binding poly(A) binding <b>21</b> | <p>&gt;sp P31483 TIA1_HUMAN Nucleolysin TIA-1 isoform p40 OS=Homo sapiens GN=TIA1 PE=1 SV=3</p> <p>MEDEMPKTL<b>Y</b>VGNLSRDVTEALILQLFSQIGPCKNCKMI<br/>MDTAGND<b>P</b>Y<b>C</b>FVE<b>F</b>HEHR<b>H</b>AAAA<b>L</b>AAMNGRKIMGKEVKV<br/>NW<b>A</b>ATTPSSQKKDTSSSTVVSTQRSQD<b>H</b>F<b>H</b>VF<b>V</b>GDLSPEI<br/>TTEDIKAA<b>F</b>AP<b>F</b>GRISDARVVKDMATGKSKGY<b>G</b>F<b>V</b>S<b>F</b>FN<br/>KW<b>D</b>AENAIQ<b>Q</b>MG<b>Q</b>W<b>L</b>GGRQ<b>I</b>RT<b>N</b>W<b>A</b>TRKPPAPKST<b>Y</b>ES<br/>NTK<b>Q</b>LS<b>Y</b>DEVV<b>N</b>QSSPSNCT<b>V</b>Y<b>C</b>GGV<b>T</b>SGLTE<b>Q</b>LMR<b>Q</b>TE<br/>SP<b>F</b>GGIME<b>I</b>RV<b>F</b>PK<b>G</b>Y<b>S</b>F<b>V</b>RFNSHESAA<b>H</b>A<b>I</b>VS<b>V</b>NGTT<br/>IEGHVV<b>K</b>CY<b>W</b>GKETLDMIN<b>P</b>V<b>Q</b>Q<b>N</b>Q<b>I</b>G<b>Y</b>P<b>O</b>P<b>Y</b>G<b>Q</b>W<b>G</b>Q<b>W</b><br/><b>Y</b>G<b>N</b>A<b>Q</b>Q<b>I</b>G<b>Q</b>Y<b>M</b>P<b>N</b>G<b>W</b><b>Q</b>V<b>P</b>A<b>Y</b>G<b>M</b>Y<b>G</b>Q<b>A</b>W<b>N</b>Q<b>Q</b>G<b>F</b>N<b>O</b>T<b>Q</b>S<b>S</b>A<br/><b>P</b>W<b>M</b>G<b>P</b>N<b>Y</b>G<b>V</b>Q<b>P</b>P<b>Q</b>G<b>Q</b>NGSMLPNQ<b>P</b>SG<b>Y</b>RVAG<b>Y</b>ET<b>Q</b></p> <p>UniProt<br/>Contains 3 RRM (RNA recognition motif) domains.<br/>7-83 RRM1<br/>106-184 RRM2<br/>214-286 RRM3</p>                                                                                                                                                                                                                                                                                                                                                                       | C-terminal, 292-386, Welander distal myopathy | 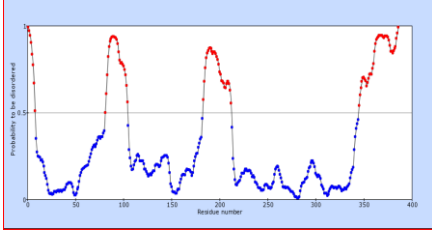   |
| 12 | Heterogeneous nuclear ribonucleoprotein A1-like 2, 2-320 nucleotide binding <b>12</b>                     | <p>&gt;sp Q32P51 RA1L2_HUMAN Heterogeneous nuclear ribonucleoprotein A1-like 2 OS=Homo sapiens GN=HNRNPA1L2 PE=2 SV=2</p> <p>MSKSASPKE<b>P</b>E<b>Q</b>LR<b>K</b>L<b>F</b>IG<b>L</b>S<b>F</b>ET<b>T</b>DE<b>S</b>LR<b>S</b>H<b>F</b>E<b>Q</b>W<b>G</b>T<br/>L<b>T</b>D<b>C</b>V<b>V</b>M<b>R</b>D<b>P</b>N<b>T</b>K<b>R</b>S<b>R</b>G<b>F</b>G<b>F</b>V<b>T</b>Y<b>A</b>T<b>V</b>E<b>E</b>V<b>D</b>A<b>A</b>M<b>N</b>T<b>T</b>P<b>H</b>K<br/>V<b>D</b>G<b>R</b>V<b>V</b>E<b>P</b>K<b>R</b>A<b>V</b>S<b>R</b>E<b>D</b>S<b>Q</b>R<b>P</b>G<b>A</b>H<b>L</b>T<b>V</b>K<b>K</b>I<b>F</b>V<b>G</b>G<b>I</b>K<b>E</b>D<b>T</b>E<br/>E<b>H</b>H<b>L</b>R<b>D</b>Y<b>F</b>E<b>Q</b>Y<b>G</b>K<b>I</b>E<b>V</b>I<b>E</b>I<b>M</b>T<b>D</b>R<b>G</b>S<b>G</b>K<b>R</b>G<b>F</b>A<b>F</b>V<b>T</b>F<b>D</b>D<b>H</b><br/>D<b>S</b>V<b>D</b>K<b>I</b>V<b>I</b>Q<b>K</b>Y<b>H</b>T<b>V</b>K<b>G</b>H<b>N</b>C<b>E</b>V<b>R</b>K<b>A</b>L<b>P</b>K<b>Q</b>E<b>M</b>A<b>S</b>A<b>S</b>S<b>S</b>Q<b>R</b>G<br/>R<b>R</b>G<b>S</b>G<b>N</b>F<b>G</b>G<b>G</b>R<b>G</b>D<b>G</b>F<b>G</b>G<b>N</b>D<b>N</b>F<b>G</b>R<b>G</b>G<b>N</b>F<b>S</b>G<b>R</b>G<b>G</b>F<b>G</b>G<b>S</b>C<b>G</b>G<br/><b>G</b>G<b>Y</b><b>G</b>G<b>S</b>G<b>D</b>G<b>Y</b>NG<b>F</b>G<b>N</b>D<b>G</b>S<b>N</b>F<b>G</b>G<b>G</b>G<b>S</b>Y<b>N</b>D<b>F</b>G<b>N</b>Y<b>N</b>Q<b>S</b>S<b>N</b>F<br/>G<b>P</b>M<b>K</b>G<b>G</b>N<b>F</b><b>G</b>R<b>S</b>S<b>G</b>P<b>Y</b><b>G</b>G<b>G</b>G<b>Q</b>Y<b>F</b>A<b>K</b>P<b>Q</b>N<b>Q</b>G<b>G</b>Y<b>G</b>V<b>S</b>S<b>S</b>S<br/>S<b>Y</b>G<b>S</b>G<b>R</b>R<b>F</b></p> <p>UniProt<br/>Contains 2 RRM (RNA recognition motif) domains</p> | C-terminal, 198-320                           |  |

14-97 RMM1  
105-184 RMM2  
4-94 Globular Domain A  
95-185 Globular Domain B  
218-240 RNA-binding RGG-box  
195-317 Gly-rich

T-reks

>sp|Q32P51|RA1L2\_HUMAN Heterogeneous  
nuclear ribonucleoprotein A1-like 2  
OS=Homo sapiens GN=HNRNPA1L2 PE=2 SV=2  
Length: 6 residues - nb: 5 from 217  
to 248 - Psim:0.7777777777777778 region  
Length:32  
GR-GGNFS-  
GR-GG-FG-  
GSCGG--G-  
GY-GG-SGD  
GY-NG-FG-  
\*\*\*\*\*

Length: 7 residues - nb: 4 from 202  
to 229 - Psim:0.7222222222222222 region  
Length:28  
FGGGRGDG-  
FG-G-NDN-  
FGRG-GNF-  
SGRG-G-FG  
\*\*\*\*\*

Length: 7 residues - nb: 5 from 215  
to 249 - Psim:0.6666666666666666 region  
Length:35  
NF-GR-GG-  
NFSGR-GG-  
-FGGSCGGG  
GYGGS-GD-  
GYNGF-GN-  
\*\*\*\*\*

Length: 8 residues - nb: 2 from 195  
to 212 - Psim:0.85 region Length:18  
GRRGSGNFGG  
GR-GDG-FGG

|           |                                                                                                                   |                                                                                                                                                                                                                                                                                                                                                                                                                                                                                                                                                                                                                                                                                                                                                                                                                                                                                                                                                                                                                                                                                 |                            |                                                                                       |
|-----------|-------------------------------------------------------------------------------------------------------------------|---------------------------------------------------------------------------------------------------------------------------------------------------------------------------------------------------------------------------------------------------------------------------------------------------------------------------------------------------------------------------------------------------------------------------------------------------------------------------------------------------------------------------------------------------------------------------------------------------------------------------------------------------------------------------------------------------------------------------------------------------------------------------------------------------------------------------------------------------------------------------------------------------------------------------------------------------------------------------------------------------------------------------------------------------------------------------------|----------------------------|---------------------------------------------------------------------------------------|
| <p>13</p> | <p>Heterogeneous nuclear ribonucleoprotein H, 1-449 nucleotide binding poly(U) RNA binding</p> <p>145</p>         | <p>*****</p> <p>&gt;sp P31943 HNRH1_HUMAN Heterogeneous nuclear ribonucleoprotein H OS=Homo sapiens GN=HNRNPH1 PE=1 SV=4<br/> MMLGTEGGEGFVVKVRGLPWSCSADEVQRFSDCKIQNG<br/> AQQIRFIYTREGRPSGEAFVELESEDEVKLALKKDRETM<br/> GHRYVEVFKSNVEMDWVLKHTGPNSPDTANDGFVRLRG<br/> LPFGCSKEEIVQFFSGLIIVPNGITLPVDFQGRSTGEAF<br/> VQFASQEI AEKALKKHKERIGHRYIEIFKSSRAEVRTHY<br/> DPPRKLAMQRPGPYDRPGAGRGYNSIGRGAGFERMRRG<br/> AYGGGYGGYDDYNGYNDGYGFGSDRFGRDLNYCFSGMSD<br/> HRYGDGGSTFQSTTGHCVMRGLPYRATENDIYNFFSPL<br/> NPVRVHIEIGPDGRVTGEADVEFATHEDAVAAMSKDKAN<br/> MQHRYVELFLNSTAGASGGAYEHRYVELFLNSTAGASGG<br/> AYG SQMMGGMGLSNQSSYGGPASQQLS GGYGGGYGGQSS<br/> MSGYDQVLQENSSDFQSNIA</p> <p>UniProt</p> <p>Contains 3 RRM (RNA recognition motif) domains</p> <p>11-90 RMM1<br/> 111-188 RMM2<br/> 289-364 RMM3<br/> 234-249 repeat 1-1<br/> 354-372 repeat 2-1<br/> 374-392 repeat 2-2<br/> 418-433 repeat 1-2</p> <p><u>T-reks</u><br/> Length: 20 residues - nb: 3 from 354 to 413 - Psim:0.7 region Length:60<br/> HRYVELFLNSTAGASGGAYE<br/> HRYVELFLNSTAGASGGAYG<br/> SQMMGGMGLSNQSSYGGPAS</p> | <p>C-terminal, 382-449</p> | 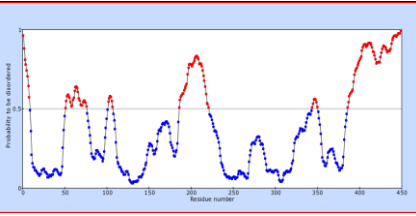   |
| <p>14</p> | <p>Splicing factor, proline- and glutamine-rich, 1-707 core promoter binding nucleotide binding transcription</p> | <p>&gt;sp P23246 SFPQ_HUMAN Splicing factor, proline- and glutamine-rich OS=Homo sapiens GN=SFPQ PE=1 SV=2<br/> MSRDRFRSRGGGGGFHRRGGGGRGGLHDFRSPPPGMG<br/> LNQNRGPMGPGPGQSGPKPPIPPPPPHQQQQQPPPOQPP<br/> PQQPPPHQPPPHQPHQQQQPPPPQDSSKPVVAQGGPGP<br/> APGVGSAPPASSAPPATPPTSGAPPGSGPGPTPTPPPA<br/> VTSAPPGAPPPTPPSSGVPTTPPQAGGPPPPAAVPGPG<br/> PGPKQGGPGGPKGGKMPGGPKGGPGLSTPGGHPKPP<br/> HRGGGEPRGGRQHHPYHQHHQGGPPGGPGRSEEKIS<br/> DSEGFKANLSLLRRPGEKTYTQRCLFVGNLPADITEDE<br/> FKRLFAYGEPGEVFINKGKGFIFIKLESRALAEIAKAE<br/> LDDTPMRGRQLRVRFATHAAALSVRNLSPVVSNELLEEA</p>                                                                                                                                                                                                                                                                                                                                                                                                                                                                                                             | <p>N-terminal, 41-104</p>  |  |

|                                                                                                            |                                                                                                                                                                                                                                                                                                                                                                                                                                                                                                                                                                                                                                                                                                                                                                                                                                                                                                                                                                                                                                                                           |  |  |
|------------------------------------------------------------------------------------------------------------|---------------------------------------------------------------------------------------------------------------------------------------------------------------------------------------------------------------------------------------------------------------------------------------------------------------------------------------------------------------------------------------------------------------------------------------------------------------------------------------------------------------------------------------------------------------------------------------------------------------------------------------------------------------------------------------------------------------------------------------------------------------------------------------------------------------------------------------------------------------------------------------------------------------------------------------------------------------------------------------------------------------------------------------------------------------------------|--|--|
| <p>regulatory region DNA binding transcription regulatory region sequence-specific DNA binding<br/>136</p> | <p>FSQFGPIERAVVIVDDRGRSTGKGI VEFASKPAARKAFE<br/>RCSEGVFLLTTTPRPVIVEPLEQLDDEDGLPEKLAQKNP<br/>MYQKERETPPRFAQHGTFEYEYSQRWKS LDEMEKQQREQ<br/>VEKNMKDAKDKLESEMEDAYHEHQANLLRQDLMR RQEEL<br/>RRMEELHNQEMQKRKEMQLRQEEERRRRREEEMMI RQREM<br/>EEQMRRQREEESYSRMGYMDPRERDMRMGGGGAMNMGDPY<br/>GSGGQKFPPLGGGGIGYEANPGVPPATMSGSM MG S<br/>DMRTERFGQGGAGPVGGQGPRGMGP GTPAGYGRGREEYE<br/>GPNKKPRF<br/><u>UniProt</u><br/>Contains 2 RRM (RNA recognition motif) domains.<br/>297-369 RRM1<br/>371-452 RRM2<br/>10-266 Gln/Glu/Pro-rich</p> <p><u>T-reks</u><br/>Length: 5 residues - nb: 4 from 69 to 89 - Psim:0.9166666666666666 region<br/>Length:21<br/>QQQPPP<br/>QQ-PPP<br/>QQ-PPP<br/>HQ-PPP<br/>*****</p> <p>Length: 5 residues - nb: 4 from 81 to 102 - Psim:0.75 region Length:22<br/>QPPPH-<br/>QPPPHP<br/>QPHQQQ<br/>QPPP-P<br/>*****</p> <p>Length: 5 residues - nb: 3 from 132 to 146 - Psim:0.7222222222222222 region<br/>Length:15<br/>PPAT--<br/>PPTSGA<br/>PPGSG-<br/>*****</p> <p>Length: 5 residues - nb: 4 from 161 to 177 - Psim:0.65 region Length:17<br/>PPGA-</p> |  |  |
|------------------------------------------------------------------------------------------------------------|---------------------------------------------------------------------------------------------------------------------------------------------------------------------------------------------------------------------------------------------------------------------------------------------------------------------------------------------------------------------------------------------------------------------------------------------------------------------------------------------------------------------------------------------------------------------------------------------------------------------------------------------------------------------------------------------------------------------------------------------------------------------------------------------------------------------------------------------------------------------------------------------------------------------------------------------------------------------------------------------------------------------------------------------------------------------------|--|--|

|  |                                                                                                                                                                                                                                                                                                                                                                                                                                                                                                                                                                                                                                                                                                                                                                                                                |  |  |
|--|----------------------------------------------------------------------------------------------------------------------------------------------------------------------------------------------------------------------------------------------------------------------------------------------------------------------------------------------------------------------------------------------------------------------------------------------------------------------------------------------------------------------------------------------------------------------------------------------------------------------------------------------------------------------------------------------------------------------------------------------------------------------------------------------------------------|--|--|
|  | <p>PPPT-<br/>PPSSG<br/>VPTT-<br/>*****</p> <p>Length: 5 residues - nb: 4 from 205<br/>to 223 - Psim:0.75 region Length:19<br/>GG-PK-<br/>GG-KMP<br/>GG-PKP<br/>GGGPG-<br/>*****</p> <p>Length: 5 residues - nb: 5 from 218<br/>to 242 - Psim:0.6571428571428571 region<br/>Length:25<br/>-PGGG--<br/>-PGLST-<br/>-PGGHP-<br/>KPP-HR-<br/>-GGGEPR<br/>*****</p> <p>Length: 5 residues - nb: 3 from 541<br/>to 556 - Psim:0.6666666666666666 region<br/>Length:16<br/>RRQEEL<br/>RRMEE-<br/>LHNQE-<br/>*****</p> <p>Length: 5 residues - nb: 3 from 670<br/>to 685 - Psim:0.7777777777777778 region<br/>Length:16<br/>GGAGPV<br/>GGQGP-<br/>RGMGP-<br/>*****</p> <p>Length: 6 residues - nb: 6 from 69 to<br/>103 - Psim:0.6944444444444444 region<br/>Length:35<br/>QQQPPP<br/>QQPPP-<br/>QQPPPH<br/>QPPPHP</p> |  |  |
|--|----------------------------------------------------------------------------------------------------------------------------------------------------------------------------------------------------------------------------------------------------------------------------------------------------------------------------------------------------------------------------------------------------------------------------------------------------------------------------------------------------------------------------------------------------------------------------------------------------------------------------------------------------------------------------------------------------------------------------------------------------------------------------------------------------------------|--|--|

QPHQQQ  
QPPPPP  
\*\*\*\*\*

Length: 6 residues - nb: 4 from 81 to 103 - Psim:0.75 region Length:23  
QPPPH-  
QPPPHP  
QPHQQQ  
QPPPPP  
\*\*\*\*\*

Length: 6 residues - nb: 3 from 123 to 141 - Psim:0.7083333333333334 region  
Length:19  
SAPPAS-S  
SAPPAT--  
--PPTSGA  
\*\*\*\*\*

Length: 6 residues - nb: 3 from 209 to 224 - Psim:0.7222222222222222 region  
Length:16  
GG-KMP  
GG-PKP  
GGPGL  
\*\*\*\*\*

Length: 7 residues - nb: 3 from 118 to 137 - Psim:0.6666666666666666 region  
Length:20  
APGVGS-  
APPASSS  
APPATPP  
\*\*\*\*\*

Length: 8 residues - nb: 3 from 117 to 140 - Psim:0.6666666666666666 region  
Length:24  
PA-PGVGSAP  
PA--S-SSAP  
PATPPT-SG-  
\*\*\*\*\*

Length: 8 residues - nb: 3 from 198 to 223 - Psim:0.7777777777777778 region

|    |                                                                                                                                      |                                                                                                                                                                                                                                                                                                                                                                                                                                                                                                                                                                                                                                                                                                                                                                                                                                                                                                |                                 |  |
|----|--------------------------------------------------------------------------------------------------------------------------------------|------------------------------------------------------------------------------------------------------------------------------------------------------------------------------------------------------------------------------------------------------------------------------------------------------------------------------------------------------------------------------------------------------------------------------------------------------------------------------------------------------------------------------------------------------------------------------------------------------------------------------------------------------------------------------------------------------------------------------------------------------------------------------------------------------------------------------------------------------------------------------------------------|---------------------------------|--|
|    |                                                                                                                                      | <p>Length:26<br/> PKQGP G P G G<br/> PKGGKMPGG<br/> PKP G G G P G -<br/> *****</p> <p>Length: 8 residues - nb: 3 from 574 to 600 - Psim:0.7333333333333333 region<br/> Length:27<br/> RE-EEMMIRQ<br/> REMEEQMRRQ<br/> RE-ESYS-RM<br/> *****</p>                                                                                                                                                                                                                                                                                                                                                                                                                                                                                                                                                                                                                                                |                                 |  |
| 15 | <p>Heterogeneous nuclear ribonucleoprotein A0, 1-305<br/> AU-rich element binding poly(A) RNA binding RNA binding<br/> <b>89</b></p> | <p>&gt;sp Q13151 ROA0_HUMAN Heterogeneous nuclear ribonucleoprotein A0 OS=Homo sapiens GN=HNRNPA0 PE=1 SV=1<br/> MENSQ LCKLFIGGLNVQTSSEGLRGHFEAFGTLTDCVVV<br/> VNPQTKRSRCFGFVTYSNVEEADAAMAASPHAVDGN TVE<br/> LKRAVSREDSARPGAHAKVKKL FVGG LKGDVAEGDLIEH<br/> FSQFGTVEKAEI IADKQSGKKRFGFVYFQNHDAADKAA<br/> VVKFHP IQGHRVEVKKAVPKEDIYSGGGGGSRSSRGGR<br/> GGRGRGGGRDQNGLSKGGGGYNSYGGYGGGGGGYNAY<br/> GGGGGSSYGGSDYGNFGGFGSYSQHSSYGPMKSGGG<br/> GGGGSSWGGRSNSGYPYRGQYGGGGYGGSSF</p> <p>UniProt<br/> Contains 2 RRM (RNA recognition motif) domains.<br/> 7-86 RRM1<br/> 98-175 RRM2<br/> 191-305 Gly-rich</p> <p><u>T-reks</u><br/> Length: 6 residues - nb: 11 from 239 to 305 - Psim:0.6636363636363637 region<br/> Length:67<br/> --GG-SS-Y-<br/> --GG-SDYG-<br/> -NGF-GGFG-<br/> SYSQ-HQ-S-<br/> SYGP-MK---<br/> -SGG-GG-GG<br/> --GG-SS-W-<br/> --GGRSN-S-<br/> --GPYRG-G-<br/> -YGG-GG-G-</p> | <p>C-terminal,<br/> 206-305</p> |  |



|    |                                                                                            |                                                                                                                                                                                                                                                                                                                                                                                                                                                                                                                                                                                                                                                                                                                                                                                                                                                                                                                                                                                                                                                                                                                                                                                         |                            |                                                                                     |
|----|--------------------------------------------------------------------------------------------|-----------------------------------------------------------------------------------------------------------------------------------------------------------------------------------------------------------------------------------------------------------------------------------------------------------------------------------------------------------------------------------------------------------------------------------------------------------------------------------------------------------------------------------------------------------------------------------------------------------------------------------------------------------------------------------------------------------------------------------------------------------------------------------------------------------------------------------------------------------------------------------------------------------------------------------------------------------------------------------------------------------------------------------------------------------------------------------------------------------------------------------------------------------------------------------------|----------------------------|-------------------------------------------------------------------------------------|
|    |                                                                                            | -YGG-SS-F-                                                                                                                                                                                                                                                                                                                                                                                                                                                                                                                                                                                                                                                                                                                                                                                                                                                                                                                                                                                                                                                                                                                                                                              |                            |                                                                                     |
| 16 | <p>Heterogeneous nuclear ribonucleoprotein H2, 1-449 nucleotide binding RNA binding 62</p> | <p>&gt;sp P55795 HNRH2_HUMAN Heterogeneous nuclear ribonucleoprotein H2 OS=Homo sapiens GN=HNRNPH2 PE=1 SV=1<br/> MMLSTEGREGFVVKVRGLPWSCSADEVMRFFSDCKIQNG<br/> TSGIRFIYTREGRPSGEAFVELESEEEVKKLALKKDRETM<br/> GHRYVEVFKSNVEMDWVLKHTGPNSPDTANDGFVRLRG<br/> LPFGCSKEEIVQFFSGLEIVPNGMTLPVDFQGRSTGEAF<br/> VQFASQEI AEKALKKKHKERIGHRYIEIFKSSRAEVRTHY<br/> DPPRKLAMQRPGPYDRPGAGRGYNSIGRGAGFERMRRG<br/> AYGGGYGGYDDYGGYNDGYGFGSDRFGRDLNYCFSGMSD<br/> HRYGDGSSSFQSTTGHCVHMRGLPYRATENDIYNFFSPL<br/> NPMRVHIEIGPDGRVTGEADVEFATHEDAVAAMAKDKAN<br/> MQHRYVELFLNSTAGTSGGAYDHSYVELFLNSTAGASGG<br/> AYGSMGGMGLSNQSSYGGPASQQLSGGYGGYGGQSS<br/> MSGYDQVLQENSDDYQSNLA<br/> UniProt<br/> Contains 3 RRM (RNA recognition motif) domains<br/> 11-90 RRM1<br/> 111-188 RRM2<br/> 289-364 RRM3</p> <p><u>T-reks</u><br/> Length: 5 residues - nb: 4 from 236 to 254 - Psim:0.7083333333333334 region<br/> Length:19<br/> YGGG--<br/> YGGYDD<br/> YGGYN-<br/> -DGYG-<br/> *****</p> Length: 6 residues - nb: 3 from 240 to 258 - Psim:0.7619047619047619 region<br>Length:19<br>YGGYDD-<br>YGGYNDG<br>YFGSD-<br>***** Length: 9 residues - nb: 2 from 235 to 252 - Psim:0.7083333333333334 region<br>Length:18 | <p>C-terminal, 382-449</p> | 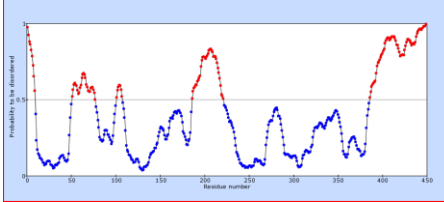 |

|    |                                                              |                                                                                                                                                                                                                                                                                                                                                                                                                                                                                                                                                                                                                                                                                                                                                                                                                                                                                                                                                                                                                                                                                                                                                                                                                                                                                                                                                                                                                                                                                                                                                                                               |                        |                                                                                     |
|----|--------------------------------------------------------------|-----------------------------------------------------------------------------------------------------------------------------------------------------------------------------------------------------------------------------------------------------------------------------------------------------------------------------------------------------------------------------------------------------------------------------------------------------------------------------------------------------------------------------------------------------------------------------------------------------------------------------------------------------------------------------------------------------------------------------------------------------------------------------------------------------------------------------------------------------------------------------------------------------------------------------------------------------------------------------------------------------------------------------------------------------------------------------------------------------------------------------------------------------------------------------------------------------------------------------------------------------------------------------------------------------------------------------------------------------------------------------------------------------------------------------------------------------------------------------------------------------------------------------------------------------------------------------------------------|------------------------|-------------------------------------------------------------------------------------|
|    |                                                              | <p>AYGGGYGGYDD-<br/> -----YGGYNDG<br/> *****<br/> Length: 20 residues - nb: 2 from 356<br/> to 395 - Psim:0.9 region Length:40<br/> YVELFLNSTAGTSSGGAYDHS<br/> YVELFLNSTAGASGGAYGSQ</p>                                                                                                                                                                                                                                                                                                                                                                                                                                                                                                                                                                                                                                                                                                                                                                                                                                                                                                                                                                                                                                                                                                                                                                                                                                                                                                                                                                                                       |                        | 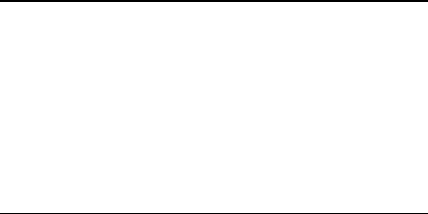  |
| 17 | Deleted in azoospermia protein 2, 1-558 nucleotide binding 1 | <p>&gt;sp Q13117 DAZ2_HUMAN Deleted in azoospermia protein 2 OS=Homo sapiens GN=DAZ2 PE=1 SV=3<br/> MSAANPETPNSTISREASTQSSSAAASQGWWLPEGKIVP<br/> NTVFGGIDARMDETEIGSCFGRYGSVKEVKIITNRTGV<br/> SKGYGFVSVFVNDVDVQKIVGSQIHFGKKLKLGPAIRKQ<br/> KLCARHVQPRPLVVNPPPPQFQNVWRNPNTETYLQPOI<br/> TPNPVTQHVQAYSAYPHSPGQVITGCQLLVYNYQEYPTY<br/> PDSAFQVTTGYQLPVYNYQPFPAIPRSPPFQVTAGYQLPV<br/> YNYQAFPAYPNSPFQVATGYQFPVYNYQFPFAYPSSPFQ<br/> VTAGYQLPVYNYQAFPAYPNSPFQVATGYQFPVYNYQAF<br/> PAYPNSPFVQVTTGYQLPVYNYQAFPAYPNSPFVQVTTGYQ<br/> LPVYNYQAFPAYPSSPFQVTTGYQLPVYNYQAFPAYPSS<br/> PFQVTTGYQLPVYNYQAFPAYPSSPFQVTTGYQLPVYNY<br/> QAFPAYPSSPFQVTTGYQLPVYNYQAFPAYPSSPFQVTT<br/> GYQLPVYNYQAFPAYPSSPFQVTTGYQLPVYNYQAFPAY<br/> PNSAVQVTTGYQFHVYNYQMPPQCPVGEQRRNLWTEAYK<br/> WWYLVCLIQRRD<br/> <b>UniProt</b><br/> The DAZ-like repeats are essential and mediate the interaction with DAZAP1 and DAZAP2.<br/> Contains 15 DAZ-like domains<br/> [AYPHSPGQVITGCQLLVYNYQ]<br/> Contains 1 RRM (RNA recognition motif) domain<br/> 40-115 RRM1</p> <p>MSAANPETPNSTISREASTQSSSAAASQGWWLPEGKIVP<br/> NTVFGGIDARMDETEIGSCFGRYGSVKEVKIITNRTGV<br/> SKGYGFVSVFVNDVDVQKIVGSQIHFGKKLKLGPAIRKQ<br/> KLCARHVQPRPLVVNPPPPQFQNVWRNPNTETYLQPOI<br/> TPNPVTQHVQAYSAYPHSPGQVITGCQLLVYNYQEYPTY<br/> PDSAFQVTTGYQLPVYNYQPFPAIPRSPPFQVTAGYQLPV<br/> YNYQAFPAYPNSPFQVATGYQFPVYNYQFPFAYPSSPFQ<br/> VTAGYQLPVYNYQAFPAYPNSPFQVATGYQFPVYNYQAF<br/> PAYPNSPFVQVTTGYQLPVYNYQAFPAYPNSPFVQVTTGYQ<br/> LPVYNYQAFPAYPSSPFQVTTGYQLPVYNYQAFPAYPSS<br/> PFQVTTGYQLPVYNYQAFPAYPSSPFQVTTGYQLPVYNY<br/> QAFPAYPSSPFQVTTGYQLPVYNYQAFPAYPSSPFQVTT</p> | C-terminal,<br>211-410 |  |

|    |                                                                                                                                                                                                                                                                           |                                                                                                                                                                                                                                                                                                                                                                                                                                                                                                                                                                                                                                                                                                                                                                                                                                                                                                                           |                              |                                                                                      |
|----|---------------------------------------------------------------------------------------------------------------------------------------------------------------------------------------------------------------------------------------------------------------------------|---------------------------------------------------------------------------------------------------------------------------------------------------------------------------------------------------------------------------------------------------------------------------------------------------------------------------------------------------------------------------------------------------------------------------------------------------------------------------------------------------------------------------------------------------------------------------------------------------------------------------------------------------------------------------------------------------------------------------------------------------------------------------------------------------------------------------------------------------------------------------------------------------------------------------|------------------------------|--------------------------------------------------------------------------------------|
|    |                                                                                                                                                                                                                                                                           | <p>GYQLPVYNYQAFPAYPSSPFQVTTGYQLPVYNYQAFPAY<br/> PNSAVQVTTGYQFHVYNYQMPPQCPVGEQRRNLWTEAYK<br/> WWYLVCLIQRD</p> <p><b>T-reks</b><br/> Length: 21 residues - nb: 15 from 177<br/> to 533 - Psim:0.902777777777778 region<br/> Length:357<br/> QVITGCQLLVYNYQEYPTYPSAF<br/> QVTTGYQLPVYNYQFPAYPRSPF<br/> QVTAGYQLPVYNYQAFPAYPNSPF<br/> QVATGYQFPVYNYQFPAYPSSPF<br/> QVTAGYQLPVYNYQAFPAYPNSPF<br/> QVATGYQFPVYNYQAFPAYPNSPV<br/> QVTTGYQLPVYNYQAFPAYPNSPV<br/> QVTTGYQLPVYNYQAFPAYPSSPF<br/> QVTTGYQLPVYNYQAFPAYPSSPF<br/> QVTTGYQLPVYNYQAFPAYPSSPF<br/> QVTTGYQLPVYNYQAFPAYPSSPF<br/> QVTTGYQLPVYNYQAFPAYPSSPF<br/> QVTTGYQLPVYNYQAFPAYPSSPF<br/> QVTTGYQLPVYNYQAFPAYPNSAV<br/> QVTTGYQFHVYNYQ-MP--PQCPV</p>                                                                                                                                                                                                                   |                              |                                                                                      |
| 18 | <p>RNA binding<br/> motif protein<br/> 14,<br/> 1-669<br/> ligand-<br/> dependent<br/> nuclear<br/> receptor<br/> transcription<br/> coactivator<br/> activity<br/> nucleotide<br/> binding<br/> protein<br/> binding,<br/> bridging<br/> RNA<br/> polymerase<br/> II</p> | <p>&gt;sp Q96PK6 RBM14_HUMAN RNA-binding<br/> protein 14 OS=Homo sapiens GN=RBM14<br/> PE=1 SV=2<br/> MKIFVGNVDGADTTPEELAALFAPYGTVMSCAVMKQFAF<br/> VHMRENAGALRAIEALHGHELRLPGRALVVEMSRPRPLNT<br/> WKIFVGNVSAACTSQELRSLFERRGRVIECDVVKDYAFV<br/> HMEKEADAKAAIAQLNGKEVKGKRINVELSTKGQKKGPG<br/> LAVQSGDKTKKPGAGDTAFPGTGGFSATFDYQQAAGNST<br/> GGFDGQARQPTPPFFGRDRSPLRRSPPRASYVAPLTAQP<br/> ATYRAQPSVSLGAA YRAQPSASLGVGYRTQPMTAQAASY<br/> RAQPSVSLGAPYRGQLASPSSQSAASLGPYGAQPSA<br/> SALSSYGGQAAAASSLNS YGAQSSLAS YGNQPSYGAQ<br/> AASSYGVRAAASSYNTQGAASSLGSYGAQAASYGAQSAA<br/> SSLAYGAQAASYNAPSA SYNAPSA YAAQQAASYSQF<br/> AAYVAQPATAAAYASQPAAYAAQATTPMAGSYGAQPVVQ<br/> TQLNSYGAQASMLSGSYGAQSAAAAATGSYGAAAAAYGAQ<br/> PSATLAAPYRTQSSASLAASYAAQHPQAAAASYRGQPGN<br/> AYDGAGQPSAAYLSMSQGANANANSTPPPYERTRLSPPR<br/> ASYDDPYKKAVAMSKRYGSDRRLAELSDYRRLSESQLSF<br/> RRSPTKSSLDYRRLPDAHSDYARYSGSYNDYLRAAQMHS<br/> GYQRRM<br/> UniProt</p> | <p>Middle ,<br/> 264-576</p> |  |

|                                               |                                                                                                                                                                                                                                                                                                                                                                                                                                                                                                                                                                                                                                                                                                                                                                                                                                                                                                                                                                                              |  |  |
|-----------------------------------------------|----------------------------------------------------------------------------------------------------------------------------------------------------------------------------------------------------------------------------------------------------------------------------------------------------------------------------------------------------------------------------------------------------------------------------------------------------------------------------------------------------------------------------------------------------------------------------------------------------------------------------------------------------------------------------------------------------------------------------------------------------------------------------------------------------------------------------------------------------------------------------------------------------------------------------------------------------------------------------------------------|--|--|
| <p>transcription cofactor activity<br/>95</p> | <p>Contains 2 RRM (RNA recognition motif) domains<br/>1-73 RRM1<br/>79-149 RRM2<br/>224-569 Ala-rich</p> <p><u>T-reks</u><br/>Length: 8 residues - nb: 3 from 346 to 371 - Psim:0.777777777777778 region<br/>Length:26<br/>SSYGAQAA-<br/>SSYGVRAAA<br/>SSYNTQGAA<br/>*****<br/>Length: 8 residues - nb: 5 from 378 to 416 - Psim:0.7 region Length:39<br/>---GAQAAS--Y<br/>---GAQSAASS-<br/>LAYGAQAA----<br/>-SYNAQPSA---<br/>-SYNAQSAP---<br/>*****<br/>Length: 8 residues - nb: 3 from 397 to 418 - Psim:0.75 region Length:22<br/>-AQAASYN<br/>AQPSASYN<br/>-AQSAPYA<br/>*****<br/>Length: 8 residues - nb: 4 from 422 to 454 - Psim:0.725 region Length:33<br/>AASYSSQP--<br/>-AAYVAQPAT<br/>AAAYASQP--<br/>-AAYAAQAT-<br/>*****<br/>Length: 8 residues - nb: 2 from 436 to 453 - Psim:0.7727272727272727 region<br/>Length:18<br/>PATAAAYASQ-<br/>P---AAYAAQA<br/>*****<br/>Length: 8 residues - nb: 2 from 604 to 619 - Psim:0.8333333333333334 region<br/>Length:16<br/>SD-RRLAEL</p> |  |  |
|-----------------------------------------------|----------------------------------------------------------------------------------------------------------------------------------------------------------------------------------------------------------------------------------------------------------------------------------------------------------------------------------------------------------------------------------------------------------------------------------------------------------------------------------------------------------------------------------------------------------------------------------------------------------------------------------------------------------------------------------------------------------------------------------------------------------------------------------------------------------------------------------------------------------------------------------------------------------------------------------------------------------------------------------------------|--|--|

```

SDYRRLSE-
*****
Length: 9 residues - nb: 5 from 346
to 389 - Psim:0.7333333333333333 region
Length:44
---SSYGAQAA-
---SSYGVRAAA
---SSYNTQGAA
SSLGSYGAQ---
--AASYGAQSA-
*****
Length: 9 residues - nb: 5 from 346
to 389 - Psim:0.7333333333333333 region
Length:44
---SSYGAQAA-
---SSYGVRAAA
---SSYNTQGAA
SSLGSYGAQ---
--AASYGAQSA-
*****
Length: 9 residues - nb: 6 from 362
to 416 - Psim:0.7307692307692307 region
Length:55
AS---SYNTQGA-
ASSLGSYGAQA--
A----SYGAQSA-
ASSL-AYGAQA--
A----SYNAQPS-
A----SYNAQSAP
*****
Length: 9 residues - nb: 3 from 378
to 404 - Psim:0.7272727272727273 region
Length:27
GAQAASY----
GAQSAASSLAY
GAQAASYNA--
*****
Length: 9 residues - nb: 3 from 397
to 418 - Psim:0.75 region Length:22
-AQAASYN
AQPSASYN
-AQSAPYA
*****
Length: 9 residues - nb: 4 from 422
to 455 - Psim:0.7 region Length:34
AASYSSQP--

```

```

-AAYVAQPAT
AAAYASQP--
-AAYAAQATT
*****
Length: 9 residues - nb: 2 from 436
to 454 - Psim:0.75 region Length:19
PATAAAYASQ
PAAAYAAQAT-
*****
Length: 10 residues - nb: 4 from 237
to 284 - Psim:0.7708333333333334 region
Length:48
YRAQPSVSLGAA
YRAQPSASLGVG
YRTQPMTAQAAS
YRAQPSVSLGAP
*****
Length: 10 residues - nb: 4 from 346
to 381 - Psim:0.7 region Length:36
SSYGAQAA--
SSYGVRAAAA-
SSYNTQGAA-
SSLGSYGAQA
*****
Length: 10 residues - nb: 2 from 348
to 365 - Psim:0.75 region Length:18
YGAQAASS--
YGVRAAASSY
*****
Length: 10 residues - nb: 2 from 363
to 381 - Psim:0.7 region Length:19
SSYNTQGAA-
SSLGSYGAQA
*****
Length: 10 residues - nb: 2 from 384
to 404 - Psim:0.7272727272727273 region
Length:21
YGAQSAASSLA
YGAQAASYN-
*****
Length: 10 residues - nb: 3 from 430
to 456 - Psim:0.7575757575757576 region
Length:27
-AAYVAQPAT-
AAAYASQP---
-AAYAAQATTP

```

```

*****
Length: 10 residues - nb: 2 from 474
to 497 - Psim:0.75 region Length:24
YGAQASMGLSGS
YGAQSAAAATGS
*****
Length: 11 residues - nb: 4 from 237
to 284 - Psim:0.7708333333333334 region
Length:48
YRAQPSVSLGAA
YRAQPSASLGVG
YRTQPMTAQAAS
YRAQPSVSLGAP
*****
Length: 11 residues - nb: 2 from 331
to 351 - Psim:0.7272727272727273 region
Length:21
YGAQGSSLAS-
YGNQPSSYGAQ
*****
Length: 11 residues - nb: 4 from 353
to 392 - Psim:0.7166666666666667 region
Length:40
---ASSYGVRAA---
---ASSYNTQGA---
ASSLGSYGAQA----
----ASYGAQSAASS
*****
Length: 11 residues - nb: 2 from 384
to 405 - Psim:0.7272727272727273 region
Length:22
YGAQSAASSLA
YGAQAASYNAQ
*****
Length: 11 residues - nb: 3 from 473
to 507 - Psim:0.7222222222222222 region
Length:35
SYGAQASMGLSG
SYGAQSAAAATG
SYGAAAAYGAQ-
*****
Length: 12 residues - nb: 4 from 237
to 284 - Psim:0.7708333333333334 region
Length:48
YRAQPSVSLGAA
YRAQPSASLGVG

```

|    |                                                                                            |                                                                                                                                                                                                                                                                                                                                                                                                                                                                                                                                                                                                                                                                                                                                                                                                                                                                                                                                                                                                                                                                                 |                 |                                                                                     |
|----|--------------------------------------------------------------------------------------------|---------------------------------------------------------------------------------------------------------------------------------------------------------------------------------------------------------------------------------------------------------------------------------------------------------------------------------------------------------------------------------------------------------------------------------------------------------------------------------------------------------------------------------------------------------------------------------------------------------------------------------------------------------------------------------------------------------------------------------------------------------------------------------------------------------------------------------------------------------------------------------------------------------------------------------------------------------------------------------------------------------------------------------------------------------------------------------|-----------------|-------------------------------------------------------------------------------------|
|    |                                                                                            | <p>YRTQPMTAQAAS<br/>YRAQPSVSLGAP<br/>*****<br/>Length: 12 residues - nb: 2 from 305 to 330 - Psim:0.7692307692307693 region<br/>Length:26<br/>YGGAQPSASALSS<br/>YGGQAAAASSLNS<br/>*****<br/>Length: 12 residues - nb: 3 from 473 to 508 - Psim:0.7222222222222222 region<br/>Length:36<br/>SYGAQASMGLSG<br/>SYGAQSAAAATG<br/>SYGAAAAYGAQP</p>                                                                                                                                                                                                                                                                                                                                                                                                                                                                                                                                                                                                                                                                                                                                   |                 |                                                                                     |
| 19 | <p>Cleavage stimulation factor 64 kDa subunit, 1-577 nucleotide binding RNA binding 54</p> | <p>sp P33240 CSTF2_HUMAN Cleavage stimulation factor subunit 2 OS=Homo sapiens GN=CSTF2 PE=1 SV=1<br/>MAGLTVRDPVDRSLRSVVFVGNIPYEATEEQLKDIFSEV<br/>GPVVSFRLVYDRETGKPKGYGFCEYQDQETALSAMRNLN<br/>GREFSGRALRVDNAASEKNKEELKSLGTGAPVIESPYGE<br/>TISPEDAPESISKAVASLPPEQMFELMKQMKLCVQNSPQ<br/>EARNMLLQNPQLAYALLQAQVVMRIVDPEIALKILHRQT<br/>NIPTLIAGNPQPVHGAGPGSGSNVSMNQNPQAQASL<br/>GGMHVNGAPPLMQASMQGGVPAPGQMPAAVTGPGPGSLA<br/>PGGGMQAQVGMFPGSPVSMERGOVPMQDPRAAMQRGSLP<br/>ANVPTPRGLLGDAPNDPRGGTLLSVTGEVEPRGYLGPPH<br/>QGPPMHHVPGHESRGGPPHELRRGGPLPEPRPLMAEPRGP<br/>MLDQRGPPLDGRGGRDPRGIDARGMEARAMEARGLDARG<br/>LEARAMEARAMEARAMEARAMEARAMEVRGMEARGMDTR<br/>GPVPGPRGPIPSGMQGPSPINMGAVVPQGSRQVPVMQGT<br/>GMOGASIQGGSQPGGFSPGQNVTPQDHEKAALIMQVLQ<br/>LTADQIAMLPPPEQRQSILILKEQIQKSTGAP<br/>UniProt<br/>Contains 1 RRM (RNA recognition motif) domain<br/>16-94 RRM<br/>198-409 Gly/Pro-rich<br/>470-526 Gly/Pro-rich<br/>12 X 5 AA tandem repeats of M-E-A-R-[AG]<br/><br/><u>T-reks</u><br/>Length: 5 residues - nb: 9 from 416 to 460 - Psim:0.8444444444444444 region<br/>Length:45</p> | Middle, 203-288 | 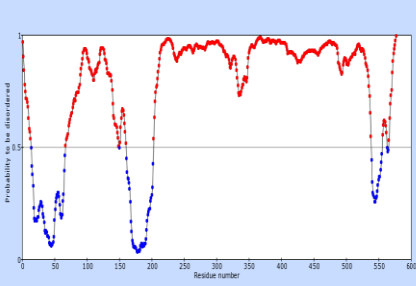 |



|    |                                                              |                                                                                                                                                                                                                                                                                                                                                                                                                                                                                                                                                                                                                                                                                                                                                        |                     |                                                                                      |
|----|--------------------------------------------------------------|--------------------------------------------------------------------------------------------------------------------------------------------------------------------------------------------------------------------------------------------------------------------------------------------------------------------------------------------------------------------------------------------------------------------------------------------------------------------------------------------------------------------------------------------------------------------------------------------------------------------------------------------------------------------------------------------------------------------------------------------------------|---------------------|--------------------------------------------------------------------------------------|
|    |                                                              | <p>EARAM<br/> EARGL<br/> DARGL<br/> EARAM<br/> EARAM<br/> EARAM<br/> EARAM<br/> EARAM<br/> EVRGM<br/> Length: 6 residues - nb: 6 from 435 to 465 - Psim:0.8888888888888888 region<br/> Length:31<br/> MEARA-<br/> MEARA-<br/> MEARA-<br/> MEARA-<br/> MEVRG-<br/> MEARGM<br/> *****<br/> Length: 6 residues - nb: 4 from 443 to 464 - Psim:0.7857142857142857 region<br/> Length:22<br/> RAMEA--<br/> RAMEA--<br/> RAMEVR-<br/> -GMEARG<br/> *****</p>                                                                                                                                                                                                                                                                                                 |                     |                                                                                      |
| 20 | Deleted in azoospermia protein 3, 1-486 nucleotide binding 1 | <p>&gt;sp Q9NR90 DAZ3_HUMAN Deleted in azoospermia protein 3 OS=Homo sapiens GN=DAZ3 PE=1 SV=1<br/> MSAANPETPNSTISREASTQSSSAAASQGWWLPEGKIVP<br/> NTVFGGIDARMDETEIGSCFGRYGSVKEVKIITNRTGV<br/> SKGYGFVSFVNDVDVQKIVGSOIHFHGKKLKLGP AIRKQ<br/> KLCARHVQPRPLVWNPPPPQFQNVWRNPNTETYLQPOI<br/> TPNPVTQHVQAYSAYPHSPGQVITGCQLLVYNYQEYPTY<br/> PDSAFQVTTGYQLPVYNYQFPAYPRSPFQVITAGYQLPV<br/> YNYQAFPAYPNSPFQVATGYQFPVYNYQFPAYPSSPFQ<br/> VTAGYQLPVYNYQAFPAYPNSPFQVATGYQFPVYNYQAF<br/> PAYPNSPVQVTTGYQLPVYNYQAFPAYPNSPFQVATGYQ<br/> FPVYNYQAFPAYPNSPVQVTTGYQLPVYNYQAFPAYPNS<br/> PFQVATGYQFPVYNYQAFPAYPNSPVQVTTGYQLPVYNY<br/> QAFPAYPNSAVQVTTGYQFHVYNYQMPPOCPVGEQRRNL<br/> WTEAYKWWYLVCLIQRRD<br/> UniProt:<br/> 12 DAZ-like domains<br/> AYPHSPGQVITGCQLLVYNYQ</p> | C-terminal, 211-410 | 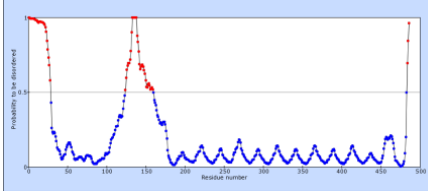 |

|    |                                                                        |                                                                                                                                                                                                                                                                                                                                                                                                                                                                                                                                                                                                                                                                                                                                                                                                                                                                                                                                                                                                                                                    |                        |                                                                                     |
|----|------------------------------------------------------------------------|----------------------------------------------------------------------------------------------------------------------------------------------------------------------------------------------------------------------------------------------------------------------------------------------------------------------------------------------------------------------------------------------------------------------------------------------------------------------------------------------------------------------------------------------------------------------------------------------------------------------------------------------------------------------------------------------------------------------------------------------------------------------------------------------------------------------------------------------------------------------------------------------------------------------------------------------------------------------------------------------------------------------------------------------------|------------------------|-------------------------------------------------------------------------------------|
|    |                                                                        | <p>1 RRM (RNA recognition motif) domain</p> <p><b>T-reks</b><br/> Length: 21 residues - nb: 12 from 177 to 461 - Psim:0.875 region Length:285<br/> QVITGCQLLVYNYQEYPTYPDSAF<br/> QVTTGYQLPVYNYQFPAYPRSPF<br/> QVTAGYQLPVYNYQAFPAYPNSPF<br/> QVATGYQFPVYNYQFPAYPSSPF<br/> QVTAGYQLPVYNYQAFPAYPNSPF<br/> QVATGYQFPVYNYQAFPAYPNSPV<br/> QVTTGYQLPVYNYQAFPAYPNSPF<br/> QVATGYQFPVYNYQAFPAYPNSPV<br/> QVTTGYQLPVYNYQAFPAYPNSPF<br/> QVATGYQFPVYNYQAFPAYPNSPV<br/> QVTTGYQLPVYNYQAFPAYPNSAV<br/> QVTTGYQFHVYNYQ-MP--PQCPV</p>                                                                                                                                                                                                                                                                                                                                                                                                                                                                                                                            |                        |                                                                                     |
| 21 | Deleted in azoospermia protein 4, nucleotide binding 1-579<br><b>1</b> | >sp Q86SG3 DAZ4_HUMAN Deleted in azoospermia protein 4 OS=Homo sapiens GN=DAZ4 PE=1 SV=2<br>MSAANPETPNSTISREASTQSSSAAASQGWVLPPEGKIVP<br>NTVFGGIDARMDETEIGSCFGRYGSVKEVKIITNRTGV<br>SKGYGFVSFVNDVDVQKIVGSQIHFGKCLKLGP AIRKQ<br>KLCARHVQPRPLVVNPPPPQFQNVWRNPNTETYLQPQI<br>TPNPVTQHVQSAANPETPNSTISREASTQSSSAAASQGW<br>VLPPEGKIVPNTVFGGIDARMDETEIGSCFGRYGSVKEV<br>KIITNRTGVSKGYGFVSFVNDVDVQKIVGSQIHFGKCLKL<br>KLGPAIRKQKLCARHVQPRPLVVNPPPPQFQNVWRNP<br>TETYLQPQITPNPVTQHVQAYSAYPHSPGQVITGCQLLV<br>YNYQEYPTYPDSAFQVTTGYQLPVYNYQFPAYPRSPFQ<br>VTAGYQLPVYNYQAFPAYPNSPFQVATGYQFPVYNYQPF<br>PAYPSSPFQVATGYQLPVYNYQAFPAYPNSPFQVATGYQ<br>FPVYNYQAFPAYPNSPVQVTTGYQLPVYNYQAFPAYPSS<br>PFQVTTGYQLPVYNYQAFPAYPNSAVQVTTGYQFHVYNY<br>QMPFPQCPVGEQRRNLWTEAYKWWYLVLCLIQRD<br>UniProt<br>2 RRM (RNA recognition motif) domains<br>40-115 RRM1<br>205-280 RRM2<br>UniProt 9 DAZ-like domains<br>AYPHSPGQVITGCQLLVYNYQ 335-355; 359-<br><br>MSAANPETPNSTISREASTQSSSAAASQGWVLPPEGKIVP<br>NTVFGGIDARMDETEIGSCFGRYGSVKEVKIITNRTGV<br>SKGYGFVSFVNDVDVQKIVGSQIHFGKCLKLGP AIRKQ | C-terminal,<br>211-382 | 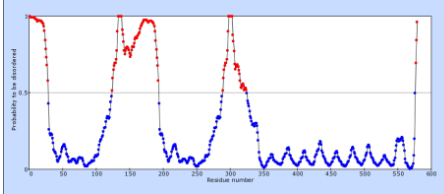 |

|    |                                                                                              |                                                                                                                                                                                                                                                                                                                                                                                                                                                                                                                                                                                                                                                                                                                                                                                                                                                                                                                                                                                                                                                                                                                                                                                                                                                                                                                                                                                                                                                                                                                                                                                                                                                                                                                                                                                                                                                                                                                                                                                                                                                                                                                                                                                                                                                                                                                                                                                                                                                                                                                                                                                                                                                                                                                                                                                                                                                                                                                                           |                                                                                                             |
|----|----------------------------------------------------------------------------------------------|-------------------------------------------------------------------------------------------------------------------------------------------------------------------------------------------------------------------------------------------------------------------------------------------------------------------------------------------------------------------------------------------------------------------------------------------------------------------------------------------------------------------------------------------------------------------------------------------------------------------------------------------------------------------------------------------------------------------------------------------------------------------------------------------------------------------------------------------------------------------------------------------------------------------------------------------------------------------------------------------------------------------------------------------------------------------------------------------------------------------------------------------------------------------------------------------------------------------------------------------------------------------------------------------------------------------------------------------------------------------------------------------------------------------------------------------------------------------------------------------------------------------------------------------------------------------------------------------------------------------------------------------------------------------------------------------------------------------------------------------------------------------------------------------------------------------------------------------------------------------------------------------------------------------------------------------------------------------------------------------------------------------------------------------------------------------------------------------------------------------------------------------------------------------------------------------------------------------------------------------------------------------------------------------------------------------------------------------------------------------------------------------------------------------------------------------------------------------------------------------------------------------------------------------------------------------------------------------------------------------------------------------------------------------------------------------------------------------------------------------------------------------------------------------------------------------------------------------------------------------------------------------------------------------------------------------|-------------------------------------------------------------------------------------------------------------|
|    |                                                                                              | <p> <span style="background-color: yellow;">KLCARHVQPRPLVVN</span><span style="background-color: yellow;">PPPPQ</span><span style="background-color: yellow;">FQNVWRNPNTETYLQPOI</span><br/> <span style="background-color: yellow;">TPNPVTQHVQSA</span><span style="background-color: yellow;">ANPETPNSTISREASTQSSSAAASQGW</span><br/> <span style="background-color: yellow;">VLPEGKIVPNTV</span><span style="background-color: yellow;">FVGGIDARMD</span><span style="background-color: yellow;">ETEIGSCFGRYGSVKEV</span><br/> <span style="background-color: yellow;">KIITNRTGVSKGYGFV</span><span style="background-color: yellow;">SFVNDVDVQKIVGSQIHFHGKKL</span><br/> <span style="background-color: yellow;">KLGPAIRKQKLCARHVQPRPLVVN</span><span style="background-color: yellow;">PPPPQ</span><span style="background-color: yellow;">FQNVWRNP</span><br/> <span style="background-color: yellow;">TETYLQPOITPNPVTQHVQAY</span><span style="background-color: yellow;">SAYPHSPG</span><span style="background-color: yellow;">QVITGCQLLV</span><br/> <span style="background-color: yellow;">YNYQEYPTY</span><span style="background-color: yellow;">PDSAFQVTTGYQLPVYNYQ</span><span style="background-color: yellow;">FPAYPRSPFQ</span><br/> <span style="background-color: yellow;">VTAGYQLPVYNYQAF</span><span style="background-color: yellow;">PAYPNSPFQ</span><span style="background-color: yellow;">VATGYQFPVYNYQ</span><span style="background-color: yellow;">FPAYPSSPFQ</span><br/> <span style="background-color: yellow;">VTAGYQLPVYNYQAF</span><span style="background-color: yellow;">PAYPNSPFQ</span><span style="background-color: yellow;">VATGYQ</span><br/> <span style="background-color: yellow;">FPVYNYQAF</span><span style="background-color: yellow;">PAYPNSPVQ</span><span style="background-color: yellow;">VTTGYQLPVYNYQAF</span><span style="background-color: yellow;">PAYPSS</span><br/> <span style="background-color: yellow;">PFQ</span><span style="background-color: yellow;">VTTGYQLPVYNYQAF</span><span style="background-color: yellow;">PAYPNSAVQ</span><span style="background-color: yellow;">VTTGYQFHVYNY</span><br/> <span style="background-color: yellow;">QMP</span><span style="background-color: yellow;">PQCFV</span><span style="background-color: yellow;">GEQRRNLWTEAYKWWYL</span><span style="background-color: yellow;">LVCLIQRRD</span> </p> <p><b>T-reks</b></p> <p>Length: 21 residues - nb: 9 from 342 to 554 - Psim:0.8564814814814815 region<br/>Length:213</p> <p> QVITGCQLLVYNYQEYPTYPSAF<br/> QVTTGYQLPVYNYQFPAYPRSPF<br/> QVTAGYQLPVYNYQAFPAYPNSPF<br/> QVATGYQFPVYNYQFPAYPSSPF<br/> QVTAGYQLPVYNYQAFPAYPNSPF<br/> QVATGYQFPVYNYQAFPAYPNSPV<br/> QVTTGYQLPVYNYQAFPAYPSSPF<br/> QVTTGYQLPVYNYQAFPAYPNSAV<br/> QVTTGYQFHVYNYQ-MP--PQCFV </p>                                                                                                                    |                                                                                                             |
| 22 | Deleted in azoospermia protein 1, 1-744 nucleotide binding translation activator activity 11 | >sp Q9NQZ3 DAZ1_HUMAN Deleted in azoospermia protein 1 OS=Homo sapiens GN=DAZ1 PE=1 SV=2<br>MSA <span style="background-color: yellow;">ANPETPNSTISREASTQSSSAAASQGW</span> <span style="background-color: yellow;">VLPEGKIVP</span><br><span style="background-color: yellow;">NTV</span> <span style="background-color: yellow;">FVGGIDARMD</span> <span style="background-color: yellow;">ETEIGSCFGRYGSVKEV</span> <span style="background-color: yellow;">KIITNRTGV</span><br><span style="background-color: yellow;">SKGYGFV</span> <span style="background-color: yellow;">SFVNDVDVQKIVGSQIHFHGKKL</span> <span style="background-color: yellow;">KLGPAIRKQ</span><br><span style="background-color: yellow;">KLCARHVQPRPLVVN</span> <span style="background-color: yellow;">PPPPQ</span> <span style="background-color: yellow;">FQNVWRNPNTETYLQPOI</span><br><span style="background-color: yellow;">TPNPVTQHVQSA</span> <span style="background-color: yellow;">ANPETPNSTISREASTQSSSAAASQGW</span><br><span style="background-color: yellow;">VLPEGKIVPNTV</span> <span style="background-color: yellow;">FVGGIDARMD</span> <span style="background-color: yellow;">ETEIGSCFGRYGSVKEV</span><br><span style="background-color: yellow;">KIITNRTGVSKGYGFV</span> <span style="background-color: yellow;">SFVNDVDVQKIVGSQIHFHGKKL</span><br><span style="background-color: yellow;">KLGPAIRKQKLCARHVQPRPLVVN</span> <span style="background-color: yellow;">PPPPQ</span> <span style="background-color: yellow;">FQNVWRNP</span><br><span style="background-color: yellow;">TETYLQPOITPNPVTQHVQSA</span> <span style="background-color: yellow;">ANPETPNSTISREASTQ</span><br><span style="background-color: yellow;">SSAAASQGW</span> <span style="background-color: yellow;">VLPEGKIVPNTV</span> <span style="background-color: yellow;">FVGGIDARMD</span> <span style="background-color: yellow;">ETEIGSCF</span><br><span style="background-color: yellow;">GRYGSVKEV</span> <span style="background-color: yellow;">KIITNRTGVSKGYGFV</span> <span style="background-color: yellow;">SFVNDVDVQKIVGS</span><br><span style="background-color: yellow;">QIHFHGKKL</span> <span style="background-color: yellow;">KLGPAIRKQKLCARHVQPRPLVVN</span> <span style="background-color: yellow;">PPPPQ</span><br><span style="background-color: yellow;">FQNVWRNPNTETYLQPOITPNPVTQHVQAY</span> <span style="background-color: yellow;">SAYPHSPGQ</span><br><span style="background-color: yellow;">VITGCQLLV</span> <span style="background-color: yellow;">YNYQEYPTYPSAFQVTTGYQLP</span> <span style="background-color: yellow;">VYNYQFP</span><br><span style="background-color: yellow;">PAYPRSPFQ</span> <span style="background-color: yellow;">VTAGYQLP</span> <span style="background-color: yellow;">VYNYQAF</span> <span style="background-color: yellow;">PAYPNSPFQ</span> <span style="background-color: yellow;">VATGYQ</span> | C-terminal, 541-716<br>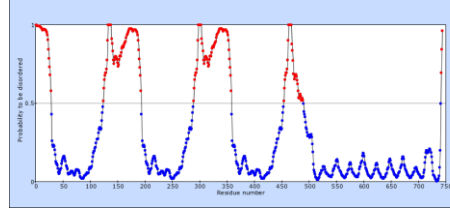 |

|    |                                                                                            |                                                                                                                                                                                                                                                                                                                                                                                                                                                                                                                                                                                                                                                                                                                                                                                                        |                            |                                                                                      |
|----|--------------------------------------------------------------------------------------------|--------------------------------------------------------------------------------------------------------------------------------------------------------------------------------------------------------------------------------------------------------------------------------------------------------------------------------------------------------------------------------------------------------------------------------------------------------------------------------------------------------------------------------------------------------------------------------------------------------------------------------------------------------------------------------------------------------------------------------------------------------------------------------------------------------|----------------------------|--------------------------------------------------------------------------------------|
|    |                                                                                            | <p>FFVYNYQFFPAYPSSPFQVVTAGYQLFVYNYQAFPAYPNS<br/> PFQVATGYQFFVYNYQAFPAYPNSPVQVTTGYQLFVYNY<br/> QAFPAYPSSPFQVTTGYQLFVYNYQAFPAYPNSAVQVTT<br/> GYQFHVYNYQMPPQCPVGEQRRNLWTEAYKWWYLVCLIQ<br/> RRD</p> <p><u>UniProt</u><br/> 9 DAZ-like domains.<br/> AYPHSPGQVITGCQLLVYNYQ 500-520; 524-544<br/> 3 RRM (RNA recognition motif) domains<br/> 40-115 RRM1<br/> 205-280 RRM2<br/> 370-445 RRM3</p> <p><u>T-reks</u><br/> Length: 24 residues - nb: 9 from 516<br/> to 731 - Psim:0.8240740740740741 region<br/> Length:216<br/> VYNYQEYPTYPDSAFQVTTGYQLP<br/> VYNYQFFPAYPRSPFQVVTAGYQLP<br/> VYNYQAFPAYPNSPFQVATGYQFF<br/> VYNYQFFPAYPSSPFQVVTAGYQLP<br/> VYNYQAFPAYPNSPFQVATGYQFF<br/> VYNYQAFPAYPNSPVQVTTGYQLP<br/> VYNYQAFPAYPSSPFQVTTGYQLP<br/> VYNYQAFPAYPNSAVQVTTGYQFH<br/> VYNYQMPPQCPVGEQRRNLWTEAY</p> |                            |                                                                                      |
| 23 | <p>Heterogeneous nuclear ribonucleoprotein H3, 1-346 nucleotide binding RNA binding 68</p> | <p>&gt;sp P31942 HNRH3_HUMAN Heterogeneous nuclear ribonucleoprotein H3 OS=Homo sapiens GN=HNRNPH3 PE=1 SV=2<br/> MDWVMKHNGPNDASDGTVRLRGLPFGCSKEEIVQFFQGL<br/> EIVPNGITLTMDYQGRSTGEAFVQFASKEIAENALGKHK<br/> ERIGHRYIEIFRSSRSEIKGFYDPPRLLGQRPGPYDRP<br/> I <b>GGRRG</b>YYGAGRGSMDRMRR<b>GGDGYDGGYGGFDDYGGY</b><br/> <b>NNYGYGND</b>GFDDRMRDGRGMGGHGYGGAGDASSGFHGGH<br/> FVHMRGLPFRATENDIANFFSPLNPIRVHIDIGADGRAT<br/> GEADVEFVTHEDAVAAMSKDKNNMQHRYIELFLNSTPGG<br/> GSGMGGSGM<b>GGYGR</b>DGMDNQ<b>GGYGS</b>VGRMGMGNNYSSGGY<br/> GTPDGLGGYGR<b>GGGGSGG</b>YYGQGGMSSGGWRRGMY</p> <p><u>UniProt</u><br/> Contains 2 RRM (RNA recognition motif) domains<br/> 16-93 RRM1<br/> 195-270 RRM2<br/> 108-344 Gly-rich</p>                                                                                          | <p>C-terminal, 268-346</p> | 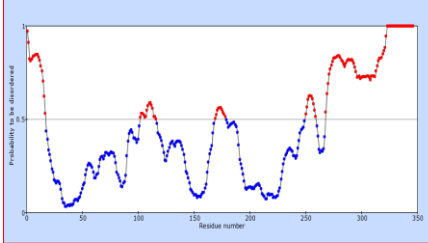 |

T-reks

Length: 3 residues - nb: 8 from 319  
to 341 - Psim:0.71875 region Length:23

GGY-

GR--

GG--

GGs-

GGY-

YGQ-

GGMS

GGG-

\*\*\*\*\*

Length: 5 residues - nb: 5 from 139  
to 164 - Psim:0.65 region Length:26

-G-GDGYD

-GGY-GG-

FD-DYG--

-G-Y-NNY

-G-Y-GND

\*\*\*\*\*

Length: 5 residues - nb: 3 from 272  
to 287 - Psim:0.8333333333333334 region

Length:16

GGGSGM

GG-SGM

GG-YGR

\*\*\*\*\*

Length: 6 residues - nb: 3 from 147  
to 164 - Psim:0.75 region Length:18

YG--GFDD

YGGY--NN

YG-YG-ND

\*\*\*\*\*

Length: 6 residues - nb: 3 from 272  
to 288 - Psim:0.8095238095238095 region

Length:17

GGGSGM-

GG-SGM-

GG-YGRD

\*\*\*\*\*

|    |                                                                                      |                                                                                                                                                                                                                                                                                                                                                                                                                                                                                                                                                                                                                                                                                                                                                                                                                                                                                                                                                                                                                                                                                                                                                                                                                                                                       |                                                   |                                                                                     |
|----|--------------------------------------------------------------------------------------|-----------------------------------------------------------------------------------------------------------------------------------------------------------------------------------------------------------------------------------------------------------------------------------------------------------------------------------------------------------------------------------------------------------------------------------------------------------------------------------------------------------------------------------------------------------------------------------------------------------------------------------------------------------------------------------------------------------------------------------------------------------------------------------------------------------------------------------------------------------------------------------------------------------------------------------------------------------------------------------------------------------------------------------------------------------------------------------------------------------------------------------------------------------------------------------------------------------------------------------------------------------------------|---------------------------------------------------|-------------------------------------------------------------------------------------|
|    |                                                                                      | <p>Length: 8 residues - nb: 2 from 146 to 162 - Psim:0.7222222222222222 region<br/> Length:17<br/> GYGGFDDYG<br/> GYNNYG-YG<br/> *****</p> <p>Length: 9 residues - nb: 2 from 281 to 297 - Psim:0.7727272727272727 region<br/> Length:17<br/> GM--GGYGRD<br/> GMDNQGGYG--</p>                                                                                                                                                                                                                                                                                                                                                                                                                                                                                                                                                                                                                                                                                                                                                                                                                                                                                                                                                                                         |                                                   |                                                                                     |
| 24 | <p>Cleavage stimulation factor subunit 2 tau variant, 1-616 nucleotide binding 8</p> | <p>&gt;sp Q9H0L4 CSTFT_HUMAN Cleavage stimulation factor subunit 2 tau variant OS=Homo sapiens GN=CSTF2T PE=1 SV=1<br/> MSSLAVRDPAMDRSLRSVVFVGNIPYEATEEQLKDIFSEV<br/> GSVVSFRLVYDRETGKPKGYGFCEYQDQETALSAMRNLN<br/> GREFSGRALRVDNAASEKNKEELKSLGPAAPIIDSPYGD<br/> PIDPEDAPESITRAVASLPPEQMFMKQMKLCVQNSHQ<br/> EARNMLLQNPQLAYALLQAQVVMRIMDPEIALKILHRKI<br/> HVTPLIIPGKSQSVSVSGPVPGLCPGPNVLLNQNP<br/> PAPQPQHLARRPVKDI PPLMQTPIQGGIPAPGPIPAAVP<br/> GAGPGSLTPGGAMQPQLGMPGVGPVPLERGVQMSDRA<br/> PIPRGPVTPGGLPPRGLLDAPNDPRGGTLLSVTGEVEP<br/> RGLYLGPPHQGPPMHASGHDTRGPSSHEMRGGPLGDPRL<br/> LIGEPKPMIDQRLPMDGRGRDRSRAMETRAMETEVL<br/> TRVMERRGMETCAMETRGMEARGMDARGLEMVGPVSSR<br/> GPMTGGIQQGPGPINIGAGGPPQGPVPGISGVGNPGAG<br/> MQGTGIQGTGMQAGIQGGGMQAGIQGVSIQGGGIQGG<br/> GIQGASKQGGSQPSSFSFGQSQVTPQDQEKAALIMQVLQ<br/> LTADQIAMLPPPEQRQSILILKEQIQKSTGAS<br/> UniProt<br/> <b>9 X 5 AA tandem repeats of M-E-T-R-[AG]</b><br/> <b>9 X 5 AA tandem repeats of G-[AT]-G-[MI]-Q</b><br/> GPMTGGIQQGPGPINIGAGGPPQGPVPGISGVGNPGAG<br/> MQGTGIQGTGMQAGIQGGGMQAGIQGVSIQGGGIQGG<br/> GIQGASKQGGSQPSSFSFGQSQVTPQDQEKAALIMQVLQ<br/> LTADQIAMLPPPEQRQSILILKEQIQKSTGAS<br/> 16-94 RRM</p> <p><u>T-reks</u><br/> Length: 4 residues - nb: 10 from 509 to 557 - Psim:0.74 region Length:49</p> | <p>C-terminal, 476-568 infertility phenotyp e</p> | 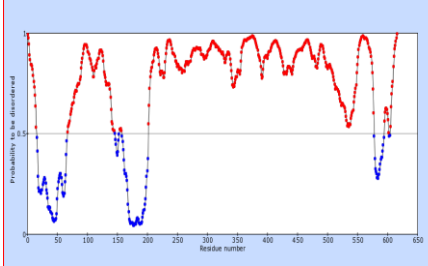 |

|    |                                                                                                                                                                                                             |                                                                                                                                                                                                                                                                                                                                                                                                                                                                                                                                                                                                                                                                                                                                                                                                                                                                                                                                                                                                     |                             |  |
|----|-------------------------------------------------------------------------------------------------------------------------------------------------------------------------------------------------------------|-----------------------------------------------------------------------------------------------------------------------------------------------------------------------------------------------------------------------------------------------------------------------------------------------------------------------------------------------------------------------------------------------------------------------------------------------------------------------------------------------------------------------------------------------------------------------------------------------------------------------------------------------------------------------------------------------------------------------------------------------------------------------------------------------------------------------------------------------------------------------------------------------------------------------------------------------------------------------------------------------------|-----------------------------|--|
|    |                                                                                                                                                                                                             | <p>QGTGI<br/> QGTGM<br/> QGAGI<br/> QGGGM<br/> QGAGI<br/> QGVSI<br/> QGGGI<br/> QGGGI<br/> QGASK<br/> <b>QGS-</b></p>                                                                                                                                                                                                                                                                                                                                                                                                                                                                                                                                                                                                                                                                                                                                                                                                                                                                               |                             |  |
| 25 | <p>CUGBP<br/> Elav-like<br/> family<br/> member 4,<br/> BRE binding<br/> nucleotide<br/> binding<br/> translation<br/> repressor<br/> activity,<br/> nucleic acid<br/> binding<br/> 1-486<br/> <b>2</b></p> | <p>&gt;sp Q9BZC1 CELF4_HUMAN CUGBP Elav-like<br/> family member 4 OS=Homo sapiens<br/> GN=CELF4 PE=1 SV=1<br/> MYIKMATLANGQADNASLSTNGLGSSPGSAGHMNGLSHS<br/> PGNPSTIPMKDHDAIKLFIGQIPRNLDEKDLKPLFEEFG<br/> KIYELTVLKDRFTGMHKGCAFLTYCERESALKAQSALHE<br/> OKTLPGMNRPIQVKPADSESRGGSSCLRQPPSQDRKLFV<br/> GMLNKQSEDDVRRRLF EAFGNIEECTILRGPDGNSKGC<br/> FVKYSSHAEAQAAINALHGSQTMPGASSSLVVKFADTDK<br/> ERTMRRMQMAGQMGMFNPMAIPFGAYGAYAQALMQQA<br/> ALMASVAQGGYLNMAAFAAAQMQQMAALNMNGLAAAPM<br/> TPTSGGSTPPGITAPAVPSIPSEIGVNGFTGLPPQANGQ<br/> PAAEAVFANGIHPYPAQSPTAADPLQQAYAGVQQYAGPA<br/> AYPAAYGQISQAFPPPPMIPQQQREGPEGCNLFYHLP<br/> QEFGDAELMQMFLPFGFVSDNPASAQTAIQAMNGFQIG<br/> MKRLKVQLKRPKDANRPY<br/> UniProt<br/> Contains 3 RRM (RNA recognition motif) domains<br/> <b>RRM 1 54-135</b><br/> <b>RRM2 152-232</b><br/> <b>RRM3 404-479</b><br/> 260-310 Ala-rich<br/><br/> <u>T-reks</u><br/> Length: 7 residues - nb: 2 from 377<br/> to 390 - Psim:0.75 region Length:14<br/> QQAYAGV-<br/> -QQYAGPA</p> | <p>Middle,<br/> 241-305</p> |  |





789-835 Coiled coil

113-263-Glu-rich

306-659 Pro-rich

605-641 His-rich

T-reks

>sp|Q96EV2|RBM33\_HUMAN RNA-binding  
protein 33 OS=Homo sapiens GN=RBM33  
PE=1 SV=3

Length: 4 residues - nb: 13 from 581  
to 633 - Psim:0.7692307692307693 region

Length:53

-P-LH--P

-P--L-PP

-P--H-QP

QP-----Q-

QP--Q-Q-

QP-----PP

-Q--H-QP

-P--H-QP

-P--H-QP

-PPQH-Q-

-P--PPQH

-P--P-QH

-P--P-QH

\*\*\*\*\*

Length: 4 residues - nb: 10 from 595  
to 633 - Psim:0.7571428571428571 region

Length:39

-Q--QP-

-QQ-QP-

-PP-QH-

-QP-PH-

-QP-PH-

QPP-P--

----QHQ

-PPPQH-

-PP-QH-

-PP-QH-

\*\*\*\*\*

Length: 4 residues - nb: 7 from 607  
to 634 - Psim:0.6785714285714286 region

Length:28

PPHQ  
PPHQ  
PPPQ  
HQPP  
PQHP  
PQHP  
PQHQ

\*\*\*\*\*

Length: 4 residues - nb: 4 from 624  
to 639 - Psim:0.6875 region Length:16

QHPP  
QHPP  
QHQH  
HHHH

\*\*\*\*\*

Length: 5 residues - nb: 3 from 367  
to 382 - Psim:0.6666666666666666 region

Length:16

TPR-MMM  
TPP-PV-  
TPQQP--

\*\*\*\*\*

Length: 5 residues - nb: 7 from 596  
to 629 - Psim:0.7857142857142857 region

Length:34

QP--QQ  
QPPPQH  
QPP--H  
QPP--H  
QPPPQH  
QPPPQ-  
HPP-QH

\*\*\*\*\*

Length: 5 residues - nb: 5 from 606  
to 629 - Psim:0.8 region Length:24

QPP--H  
QPP--H  
QPPPQH  
QPPPQ-  
HPP-QH

\*\*\*\*\*

Length: 5 residues - nb: 3 from 614  
to 629 - Psim:0.8333333333333334 region

Length:16

QPPPQH

QPPPQ-

HPP-QH

\*\*\*\*\*

Length: 5 residues - nb: 4 from 624  
to 641 - Psim:0.65 region Length:18

QHPP-

QHPP-

QHQQH

HHHHH

\*\*\*\*\*

Length: 6 residues - nb: 6 from 597  
to 631 - Psim:0.7222222222222222 region

Length:35

-PQ-QQ-PP

-P--QHQP

HQP-PH-Q-

-PPPQH-Q-

-PPPQH---

-PP-QH-PP

\*\*\*\*\*

Length: 6 residues - nb: 3 from 615  
to 631 - Psim:0.8095238095238095 region

Length:17

PPPQHQ-

PPPQH--

PP-QHPP

\*\*\*\*\*

Length: 6 residues - nb: 3 from 1006  
to 1024 - Psim:0.6666666666666666  
region Length:19

QPQRL-P

QPPEVGP

QPARK-V

\*\*\*\*\*

28 DAZ associated protein 1, 1-407, nucleotide binding RNA binding 21

```
>sp|Q96EP5|DAZP1_HUMAN DAZ-associated protein 1 OS=Homo sapiens GN=DAZAP1 PE=1 SV=1
MNNNGADEIGKLFVGGLDWSTTQETLRSYFSQYGEVVDV
VIMKDKTTNQSRGFGFVKFKDPNCVGTVLASRPHTLDGR
NIDPKPCTPRGMQPERTRPKEGWQKGRSDNSKSNKIFV
GGIPHNCGETELREYFKKFGVVTEVVMIIYDAEKQRPRGF
GFITFEDEQSVDDQAVNMHFHDIMGKKVEVKRAEPRDSKS
QAPGQPGASQWGSRVVFNAAANGWAGQPPPTWQQGYGPQG
MWPVAGQAIIGGYGPPPAGRGAPPPPPPTTSYIVSTPPGG
FPPQGFPPQGYGAPPQFSFGYGGPPPPPDQFAPPGVPPP
LATPGAAPLAFPPPPSQAAPDMSKPPTAQPDPFYGOYAG
YGDLSGFQGFSDPSQQPPSYGGPSVPGSGGPPAGGSG
FGRGQNHNVQGFHPYRR
```

UniProt

Contains 2 RRM (RNA recognition motif) domains  
 10-97 RRM1  
 113-190 RRM2  
 222-385 Pro-rich

T-reks

```
Length: 5 residues - nb: 3 from 300 to 314 - Psim:0.7142857142857143 region
Length:15
-PPDQFA
-PPG--V
PPPP--A
*****

Length: 6 residues - nb: 3 from 270 to 286 - Psim:0.75 region Length:17
-PPGGF--
PPPQGF--
--PQGYGA
*****

Length: 7 residues - nb: 2 from 374 to 388 - Psim:0.75 region Length:15
GGPSVPGS
GGPPAGG-
*****

Length: 8 residues - nb: 2 from 281 to 295 - Psim:0.75 region Length:15
PQ---GYGAP
PQFSFGYG--
```

C-terminal, 346-407

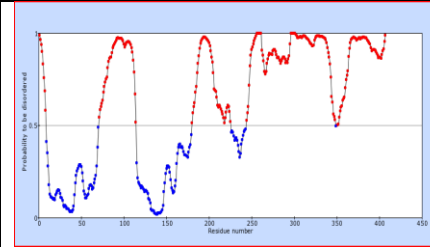

|                                                                                       |                                                                                                                                                                                                                                                                                                                                                                                                                                                                                                                                                                                                                                                                                                                                                                                                                                                                                                                                                                                                                                                                                                                                 |                            |  |
|---------------------------------------------------------------------------------------|---------------------------------------------------------------------------------------------------------------------------------------------------------------------------------------------------------------------------------------------------------------------------------------------------------------------------------------------------------------------------------------------------------------------------------------------------------------------------------------------------------------------------------------------------------------------------------------------------------------------------------------------------------------------------------------------------------------------------------------------------------------------------------------------------------------------------------------------------------------------------------------------------------------------------------------------------------------------------------------------------------------------------------------------------------------------------------------------------------------------------------|----------------------------|--|
| <p>29 Paraspeckle component 1, 1-523 core promoter binding poly(A) RNA binding 18</p> | <pre>&gt;sp Q8WXF1 PSPC1_HUMAN Paraspeckle component 1 OS=Homo sapiens GN=PSPC1 PE=1 SV=1 MMLRGNLQVRIEKNPARLRALESVAGESEPAAMAL ALAGEPAPPAPAPPEDHPDEEMGFTIDIKSFLKPGKTY TQRCRLFVGNLPTDITEEDFKRLFERYGEPSEVFINRDR GFGFIRLESRTLAEIAKAELDGTILKSRPLRIRFATHGA ALTVKNLSPVVSNELLEQAFSQFGPVEKAVVVVDDRGRA TGKGFVEFAAKPPARKALERCQDGAFLLLTTTPRPVIVEP MEQFDDDEDGLPEKLMQKTQQYHKEREQPPRFAQPGTFEF EYASRWKALDEMEKQQREQVDRNIREAKEKLEAEMEAAAR HEHQMLMRQDLMRROEELRRLEELRNQELQKRKQIQLR EEEEHRRREEEMIRHREQEELRRQEGFKPNYEMENREQE MRMGDMGPRGAINMGDAFSPAPAGNQGPPPMGMNMR ATIPGPPMGPGPAMGPEGAANMGTMPMPDNGAVHNDRFP QGPPSQMGSPMGSRTGSETPOAPMSGVGPVSGGPGGFGR GSQGGNFEGPNKRRRY UniProt Contains 2 RRM (RNA recognition motif) domains 82-154 – RRM1 156-237 – RRM2 283-377- Coiled coil 394-516 - Gly-rich T-reks Length: 5 residues - nb: 3 from 399 to 413 - Psim:0.6666666666666666 region Length:15 L-MRQD L-MRRQ EELRR- *****  Length: 5 residues - nb: 3 from 410 to 425 - Psim:0.6666666666666666 region Length:16 ELRRLE ELRN-Q ELQK-R *****  Length: 5 residues - nb: 5 from 556 to 578 - Psim:0.6571428571428571 region Length:23 -GS-PM- -GS-RT-</pre> | <p>C-terminal, 414-523</p> |  |
|---------------------------------------------------------------------------------------|---------------------------------------------------------------------------------------------------------------------------------------------------------------------------------------------------------------------------------------------------------------------------------------------------------------------------------------------------------------------------------------------------------------------------------------------------------------------------------------------------------------------------------------------------------------------------------------------------------------------------------------------------------------------------------------------------------------------------------------------------------------------------------------------------------------------------------------------------------------------------------------------------------------------------------------------------------------------------------------------------------------------------------------------------------------------------------------------------------------------------------|----------------------------|--|

|  |  |                                                                                                                                                                                                                                                                 |  |  |
|--|--|-----------------------------------------------------------------------------------------------------------------------------------------------------------------------------------------------------------------------------------------------------------------|--|--|
|  |  | <pre> -GS-ETP -QA-PM- SGVGP-V *****  Length: 6 residues - nb: 3 from 399 to 415 - Psim:0.6666666666666666 region Length:17 -LMRQD LMRRQE ELRRLE *****  Length: 8 residues - nb: 2 from 406 to 419 - Psim:0.8125 region Length:14 RRQEEL-- RRLEELRN ***** </pre> |  |  |
|--|--|-----------------------------------------------------------------------------------------------------------------------------------------------------------------------------------------------------------------------------------------------------------------|--|--|

*Inclusion body myopathy with early-onset Paget disease with or without frontotemporal dementia 3 (IBMPFD3)*

*Amyotrophic lateral sclerosis (ALS)*
